# Supplementary material for: Forest growth in Europe shows diverging large regional trends
Source: PubMed Central journal article supplement (PMC10505178; doi:10.1038/s41598-023-41077-6), 2023-09-16
Supplement: 41598_2023_41077_MOESM1_ESM.pdf [file 41598_2023_41077_MOESM1_ESM.pdf]

# Supplementary Material

for

## Forest Growth in Europe Shows Diverging Large Regional Trends

Hans Pretzsch, Miren del Río, Catia Arcangeli, Kamil Bielak, Malgorzata Dudzinska, David Ian Forrester, Joachim Klädtke, Ulrich Kohnle, Thomas Ledermann, Robert Matthews, Jürgen Nagel, Ralf Nagel, François Ningre, Thomas Nord-Larsen, Peter Biber

### Table of Contents

|                             |                                                                                                                    |    |
|-----------------------------|--------------------------------------------------------------------------------------------------------------------|----|
| Supplementary Information 1 | Conversion of wood volume to biomass                                                                               | 2  |
| Supplementary Table 1       | Size of the data set used in this study by country, and tree species                                               | 4  |
| Supplementary Table 2       | Site characteristics of the 415 long-term experiments with 642 individual plots used in this study                 | 5  |
| Supplementary Table 3       | Number of plots used in this study by European ecoregions and species                                              | 7  |
| Supplementary Table 4       | Condensed overview of important stand characteristics                                                              | 8  |
| Supplementary Table 5       | Fit results of the species overarching non-regional growth trend model                                             | 9  |
| Supplementary Table 6       | Fit results of the non-regional growth trend model for Norway spruce                                               | 10 |
| Supplementary Table 7       | Fit results of the non-regional growth trend model for Scots pine                                                  | 11 |
| Supplementary Table 8       | Fit results of the non-regional growth trend model for European beech                                              | 12 |
| Supplementary Table 9       | Fit results of the non-regional growth trend model for sessile/common oak                                          | 13 |
| Supplementary Table 10      | Fit results for the growth trends of Scots pine by trend classes                                                   | 14 |
| Supplementary Figure 1      | Grid-point-wise regression slopes indicating trends in the climate-vegetation-productivity index CVP across Europe | 15 |
| Supplementary Figure 2      | Overall growth trend for the main species Norway spruce, Scots pine, European beech, and sessile/common oak        | 16 |
| Supplementary Figure 3      | Histograms of surveys by calendar year (i.e. decade), species, and trend class                                     | 17 |
| Supplementary Table 11      | Overview of the growth and yield characteristics (last survey) of all 642 plots                                    | 18 |

## Supplementary Information 1: Conversion of wood volume to biomass

In order to allow for comparisons of production across species, we converted the stem volume values provided by the contributing institutions into above ground woody biomass (i.e. the dry weight of the stems and branches). The backbone of our approach was to use expansion factors in the following way

$$B = EF \cdot V \cdot W \quad (\text{Equation S1})$$

where B and V are above ground woody biomass and stem volume. EF is a factor for expanding V to the above ground woody volume, and W is the wood density. In order to take into account tree allometry as much as possible, we used generalized volume equations provided by Forrester et al. (2017) for deriving expansion factors. These volume equations are available for estimates of the stem volume ( $f(d)$ ) and the above ground woody volume ( $g(d)$ ) with the stem diameter at breast height, d, as the predictor. Thus, the expansion factor for a tree with diameter d results as:

$$EF = \frac{g(d)}{f(d)} \quad (\text{Equation S2})$$

Both volume functions have exactly the same form:

$$f(d) = e^{a_0+a_1 \cdot d} \cdot a_2 \quad (\text{Equation S3})$$

$$g(d) = e^{b_0+b_1 \cdot d} \cdot b_2 \quad (\text{Equation S4})$$

As the species specific parameters  $a_0$ ,  $a_1$ ,  $b_0$ ,  $b_1$  were obtained by fitting the logarithmic forms of both equations,  $a_2$ , and  $b_2$  are the correction factors required for making the backtransformation bias-free. The actual conversion was then straightforward, as for each plot and survey, the quadratic mean stem diameter was given as well as the volume for both, the remaining and the removed trees. This allowed us to calculate specific expansion factors after Equation S2, and subsequently apply Equation S1 to the remaining and removed stand of each plot at each survey. Our goal variable, the periodic annual biomass increment, PAI, between the survey times  $t_1$  and  $t_2$ , resulted as

$$PAI = \frac{B_{remain_2} + B_{remove_2} - B_{remain_1}}{t_2 - t_1} \quad (\text{Equation S5})$$

where  $B_{remain_1}$  and  $B_{remain_2}$  are the remaining biomasses at the survey times 1 and 2, and  $B_{remove_2}$  is the biomass removed at survey time 2 (or between survey times 1 and 2). From the study by Forrester et al. (2017) we took the following parameters for Equations S3 and S4; the wood densities were taken from a standard publication by Knigge and Schulz (1966).

| Species            | $a_0$   | $a_1$  | $a_2$  | $b_0$   | $b_1$  | $b_2$  | wood density (kg/m <sup>3</sup> ) |
|--------------------|---------|--------|--------|---------|--------|--------|-----------------------------------|
| Norway spruce      | -2.5027 | 2.3404 | 1.0598 | -2.0464 | 2.3048 | 1.0330 | 377                               |
| Scots pine         | -2.3583 | 2.3080 | 1.0334 | -2.1212 | 2.2679 | 1.0500 | 431                               |
| European beech     | -1.4487 | 2.1661 | 0.9979 | -1.7843 | 2.3895 | 1.0920 | 554                               |
| sessile/common oak | -2,2131 | 2.3031 | 0.9724 | -2.3149 | 2.5133 | 1.0367 | 561                               |

For the species Douglas fir, and European larch, we used the parameters of Scots pine. For silver fir, we used the same parameters as for Norway spruce.

Forrester, D. I. et al. Generalized biomass and leaf area allometric equations for European tree species incorporating stand structure, tree age and climate. *Forest Ecology and Management* 396, 160–175 (2017).

Knigge, W.; Schulz, H. 1966: *Grundriß der Forstbenutzung*. Hamburg, Berlin: Parey.

Supplementary Table 1. Size of the data set used in this study by country, and tree species. The abbreviations “trls”, “plts”, “srvs” indicate the numbers of trials, plots, and surveys, respectively. Note that the overall sum of trials amounts to 420 (instead of the 415 reported in the text) because on a few trials there are plots covering different species.

| Country / Institution     | Norway spruce |            |             | Scots Pine |            |             | Douglas fir |           |            | European Larch |           |            | silver fir |           |           | European beech |           |             | sessile/common oak |            |             | total      |            |             |
|---------------------------|---------------|------------|-------------|------------|------------|-------------|-------------|-----------|------------|----------------|-----------|------------|------------|-----------|-----------|----------------|-----------|-------------|--------------------|------------|-------------|------------|------------|-------------|
|                           | trls          | plts       | srvs        | trls       | plts       | srvs        | trls        | plts      | srvs       | trls           | plts      | srvs       | trls       | plts      | srvs      | trls           | plts      | srvs        | trls               | plts       | srvs        | trls       | plts       | srvs        |
| Austria <sup>1</sup>      | 5             | 21         | 132         | 1          | 2          | 18          |             |           |            |                |           |            |            |           |           | 2              | 5         | 54          |                    |            |             | 8          | 28         | 204         |
| Denmark <sup>2</sup>      | 2             | 16         | 184         |            |            |             |             |           |            |                |           |            | 1          | 1         | 8         | 7              | 15        | 180         | 11                 | 36         | 428         | 21         | 68         | 800         |
| England <sup>3</sup>      | 14            | 27         | 247         | 21         | 40         | 352         | 17          | 17        | 118        | 9              | 15        | 121        |            |           |           | 2              | 2         | 15          | 13                 | 13         | 102         | 76         | 114        | 955         |
| France <sup>4</sup>       |               |            |             |            |            |             |             |           |            |                |           |            |            |           |           | 9              | 20        | 290         | 11                 | 15         | 228         | 20         | 35         | 518         |
| Germany BW <sup>5</sup>   | 57            | 60         | 490         | 4          | 4          | 54          | 3           | 3         | 20         |                |           |            | 10         | 10        | 70        | 19             | 21        | 154         |                    |            |             | 93         | 98         | 788         |
| Germany GOE <sup>6</sup>  | 15            | 25         | 252         | 9          | 13         | 120         |             |           |            |                |           |            |            |           |           | 5              | 11        | 131         | 14                 | 17         | 131         | 43         | 66         | 634         |
| Germany MUE <sup>7</sup>  | 11            | 18         | 225         | 14         | 16         | 149         |             |           |            |                |           |            |            |           |           | 8              | 12        | 146         | 8                  | 9          | 76          | 41         | 55         | 596         |
| Poland <sup>8,9</sup>     |               |            |             | 5          | 21         | 209         |             |           |            | 1              | 3         | 30         |            |           |           | 2              | 4         | 38          | 6                  | 13         | 161         | 14         | 41         | 438         |
| Switzerland <sup>10</sup> | 11            | 12         | 104         |            |            |             |             |           |            |                |           |            | 2          | 2         | 13        | 6              | 7         | 90          |                    |            |             | 19         | 21         | 207         |
| Spain <sup>11</sup>       |               |            |             | 26         | 38         | 269         |             |           |            |                |           |            |            |           |           |                |           |             |                    |            |             | 26         | 38         | 269         |
| Sweden <sup>12</sup>      | 19            | 23         | 124         | 40         | 55         | 282         |             |           |            |                |           |            |            |           |           |                |           |             |                    |            |             | 59         | 78         | 406         |
| <b>total</b>              | <b>134</b>    | <b>202</b> | <b>1758</b> | <b>120</b> | <b>189</b> | <b>1453</b> | <b>20</b>   | <b>20</b> | <b>138</b> | <b>10</b>      | <b>18</b> | <b>151</b> | <b>13</b>  | <b>13</b> | <b>91</b> | <b>60</b>      | <b>97</b> | <b>1098</b> | <b>63</b>          | <b>103</b> | <b>1126</b> | <b>420</b> | <b>642</b> | <b>5815</b> |

Data provided by:

<sup>1</sup>Bundesforschungs- und Ausbildungszentrum für Wald, Naturgefahren und Landschaft, Wien, Austria; <sup>2</sup>Section Forest, Nature and Biomass, Department of Geosciences and Natural Resource Management, University of Copenhagen; <sup>3</sup>Forest Research, Alice Holt Lodge, Farnham, Surrey, United Kingdom; <sup>4</sup>Université de Lorraine, AgroParisTech, INRAE, SILVA, F-54000, Nancy, France; <sup>5</sup>Forstliche Versuchs- und Forschungsanstalt Baden-Württemberg, Abteilung Waldwachstum, Freiburg, Germany; <sup>6</sup>Nordwestdeutsche Forstliche Versuchsanstalt Sachgebiet Ertragskunde, Göttingen, Germany; <sup>7</sup>Chair of Forest Growth and Yield Science, School of Life Sciences Weihenstephan, Technical University of Munich, Freising, Germany; <sup>8</sup>Forest Research Institute, Department of Forest Management, Sekocin Stary, Poland; <sup>9</sup>Department of Silviculture, Institute of Forest Sciences, Warsaw University of Life Sciences, Warsaw, Poland (1 trial (5 plots) in Scots pine, 1 trial (3 plots) in European Larch); <sup>10</sup>Swiss Federal Research Institute WSL, Birmensdorf, Switzerland; <sup>11</sup>INIA-CSIC Forest Research Centre, Madrid and iuFOR, Sustainable Forest Management Research Institute, University of Valladolid & INIA, Spain; <sup>12</sup>Swedish University of Agricultural Sciences, Alnarp and Asa, Sweden

Supplementary Table 2. Site characteristics of the 415 long-term experiments with 642 individual plots used in this study\*.

| Trait                                                                                                                       | Class                                                                                    | sessile/<br>common |                  |                   |      |                |            |                   |
|-----------------------------------------------------------------------------------------------------------------------------|------------------------------------------------------------------------------------------|--------------------|------------------|-------------------|------|----------------|------------|-------------------|
|                                                                                                                             |                                                                                          | Scots<br>pine      | Norway<br>spruce | European<br>beech | oak  | Douglas<br>fir | silver fir | European<br>larch |
| Annual precipitation<br>(mm/a)                                                                                              | min                                                                                      | 422                | 437              | 534               | 537  | 623            | 711        | 532               |
|                                                                                                                             | median                                                                                   | 598                | 849              | 746               | 648  | 1001           | 981        | 826               |
|                                                                                                                             | max                                                                                      | 1444               | 2333             | 1387              | 1160 | 1659           | 1450       | 939               |
| Mean annual<br>temperature (°C)                                                                                             | min                                                                                      | -0.3               | 3.3              | 7.6               | 8.0  | 7.4            | 8.1        | 7.9               |
|                                                                                                                             | median                                                                                   | 8.3                | 8.7              | 9.5               | 9.2  | 9.9            | 8.7        | 9.5               |
|                                                                                                                             | max                                                                                      | 12.8               | 10.5             | 11.3              | 11.5 | 11.0           | 10.8       | 10.6              |
| Soil type<br>(Soil reference group<br>code from the World<br>Reference Base for<br>Soil Resources, as<br>provided by ESDAC) | Albeluvisol                                                                              | 1                  | 1                |                   | 7    |                |            |                   |
|                                                                                                                             | Arenosol                                                                                 | 18                 | 1                |                   | 1    |                |            |                   |
|                                                                                                                             | Cambisol                                                                                 | 42                 | 119              | 74                | 55   | 9              | 10         | 12                |
|                                                                                                                             | Fluvisol                                                                                 | 2                  |                  |                   | 8    |                |            | 4                 |
|                                                                                                                             | Gleysol                                                                                  | 2                  | 5                |                   | 3    | 4              | 1          |                   |
|                                                                                                                             | Histosol                                                                                 | 1                  | 2                |                   | 1    | 1              |            |                   |
|                                                                                                                             | Leptosol                                                                                 | 8                  | 6                | 4                 | 3    |                | 1          |                   |
|                                                                                                                             | Luvisol                                                                                  | 13                 | 25               | 14                | 13   | 3              |            |                   |
|                                                                                                                             | Marsh                                                                                    |                    | 1                |                   |      |                |            |                   |
|                                                                                                                             | Planosol                                                                                 | 2                  |                  | 5                 |      |                |            |                   |
|                                                                                                                             | Podzol                                                                                   | 90                 | 39               |                   | 12   | 2              |            | 2                 |
|                                                                                                                             | Regosol                                                                                  | 10                 | 1                |                   |      |                | 1          |                   |
|                                                                                                                             | No information                                                                           |                    | 2                |                   |      | 1              |            |                   |
| Easily available<br>water capacity                                                                                          | Medium<br>(100 – 140 mm/m)                                                               | 50                 | 76               | 4                 | 23   | 1              | 1          | 1                 |
|                                                                                                                             | High<br>(140 – 190 mm/m)                                                                 | 125                | 102              | 66                | 60   | 17             | 10         | 17                |
|                                                                                                                             | Very high<br>(> 190 mm/m)                                                                | 11                 | 19               | 27                | 19   |                | 2          |                   |
|                                                                                                                             | No information                                                                           | 3                  | 5                |                   | 1    | 2              |            |                   |
| Base saturation                                                                                                             | Low (< 50%)                                                                              | 135                | 74               | 8                 | 10   | 4              | 5          | 2                 |
|                                                                                                                             | Medium (50 - 75%)                                                                        | 17                 | 21               | 5                 | 7    | 11             | 2          | 14                |
|                                                                                                                             | High (> 75%)                                                                             | 37                 | 105              | 84                | 86   | 5              | 6          | 2                 |
|                                                                                                                             | No information                                                                           |                    | 2                |                   |      |                |            |                   |
| Soil texture                                                                                                                | Fine<br>(35% < clay < 60%)                                                               | 5                  | 2                | 13                | 7    |                | 3          | 3                 |
|                                                                                                                             | Medium fine<br>(clay < 35% and<br>sand < 15%)                                            | 11                 | 19               | 27                | 19   |                | 2          |                   |
|                                                                                                                             | Medium<br>(18% < clay < 35%<br>and sand > 15%, or<br>clay < 18% and<br>15% < sand < 65%) | 120                | 100              | 53                | 53   | 17             | 7          | 14                |
|                                                                                                                             | Coarse (clay < 18%<br>and sand > 65%)                                                    | 50                 | 76               | 4                 | 23   | 1              | 1          | 1                 |
|                                                                                                                             | No texture (because<br>of organic layer)                                                 | 3                  | 2                |                   | 1    | 1              |            |                   |

---

\*Annual precipitation and temperature values are averages from 1975-2014 taken from the European Commission's Agri4Cast portal (JRC 2018). All other data are soil properties from the European Soil Data Base v2 Raster Library 1 km x 1 km (Panagos et al. 2012), available from the European Soil Data Centre (ESDAC 2020). The numbers provided with the soil properties are the numbers of our plots in the respective category. In each category (soil type, easily available water capacity, base saturation, soil texture) the numbers add up to the total plot number of 642.

#### References for Supplementary Table 2:

JRC – Joint Research Centre of the European Commission (2018). Agri4Cast Resources Portal, available online at: <https://agri4cast.jrc.ec.europa.eu/DataPortal/Index.aspx>, last accessed 11 July 2018.

Panagos P., Van Liedekerke M., Jones A., Montanarella L., “European Soil Data Centre: Response to European policy support and public data requirements”; (2012) *Land Use Policy*, 29 (2), pp. 329-338. doi:10.1016/j.landusepol.2011.07.003

European Soil Data Centre (ESDAC), [esdac.jrc.ec.europa.eu](http://esdac.jrc.ec.europa.eu), European Commission, Joint Research Centre, last accessed 23 November 2020.

Supplementary Table 3. Number of plots used in this study by European ecoregions (alphabetical order) and species. European ecoregions after European Environment Agency (2017).

| <b>Ecoregion</b>                                               | <b>Scots pine</b> | <b>Norway spruce</b> | <b>European beech</b> | <b>sessile/ common oak</b> | <b>Douglas fir</b> | <b>silver fir</b> | <b>Europ. larch</b> | <b>Total</b> |
|----------------------------------------------------------------|-------------------|----------------------|-----------------------|----------------------------|--------------------|-------------------|---------------------|--------------|
| Alps conifer and mixed forests                                 |                   | 14                   |                       |                            |                    |                   |                     | 14           |
| Baltic mixed forests                                           |                   | 6                    | 19                    | 38                         |                    | 1                 |                     | 64           |
| Caledon coniferous forests                                     | 16                | 4                    |                       |                            | 1                  |                   | 2                   | 23           |
| Celtic broadleaf forests                                       | 18                | 20                   |                       | 7                          | 14                 |                   | 6                   | 65           |
| Central European mixed forests                                 | 22                |                      |                       | 12                         |                    |                   | 3                   | 37           |
| English Lowlands beech forests                                 | 6                 | 3                    | 2                     | 6                          | 2                  |                   | 7                   | 26           |
| Iberian conifer forests                                        | 11                |                      |                       |                            |                    |                   |                     | 11           |
| Iberian sclerophyllous and semi-deciduous forests              | 2                 |                      |                       |                            |                    |                   |                     | 2            |
| Northern Temperate Atlantic Northwest Iberian montane forests  | 5                 | 12                   |                       | 6                          |                    |                   |                     | 23           |
| Pannonian mixed forests                                        | 2                 |                      | 3                     |                            |                    |                   |                     | 5            |
| Sarmatic mixed forests                                         | 10                | 17                   |                       |                            |                    |                   |                     | 27           |
| Scandinavian and Russian taiga                                 | 45                | 4                    |                       |                            |                    |                   |                     | 49           |
| Southern Temperate Atlantic Western European broadleaf forests |                   |                      | 7                     | 11                         |                    |                   |                     | 18           |
|                                                                | 27                | 122                  | 66                    | 23                         | 3                  | 12                |                     | 253          |
| <b>Total</b>                                                   | <b>189</b>        | <b>202</b>           | <b>97</b>             | <b>103</b>                 | <b>20</b>          | <b>13</b>         | <b>18</b>           | <b>642</b>   |

Reference for Supplementary Table 3:

European Environment Agency (2017) Digital map of European ecological regions. Online <https://www.eea.europa.eu/data-and-maps/data/digital-map-of-european-ecological-regions> (last visited 8 October 2020)

Supplementary Table 4. Overview of important stand characteristics (at the last survey) of the 415 long-term experiments with 642 individual plots included in this study\*.

|                                                               | European beech |      | Douglas fir |      | silver fir |      | European larch |      | sessile/common oak |      | Scots pine |      | Norway spruce |      |
|---------------------------------------------------------------|----------------|------|-------------|------|------------|------|----------------|------|--------------------|------|------------|------|---------------|------|
|                                                               | min            | max  | min         | max  | min        | max  | min            | max  | min                | max  | min        | max  | min           | max  |
| Number of plots                                               | 97             |      | 20          |      | 13         |      | 18             |      | 103                |      | 189        |      | 202           |      |
| First and last survey (year)                                  | 1870           | 2016 | 1911        | 2013 | 1883       | 2012 | 1913           | 2015 | 1885               | 2016 | 1890       | 2016 | 1873          | 2015 |
| Number of surveys                                             | 5              | 32   | 5           | 11   | 5          | 12   | 5              | 14   | 5                  | 21   | 4          | 19   | 5             | 21   |
| Age (a)                                                       | 40             | 193  | 32          | 117  | 60         | 134  | 39             | 84   | 40                 | 221  | 31         | 155  | 29            | 191  |
| N (ha <sup>-1</sup> )                                         | 100            | 1600 | 191         | 1310 | 309        | 2420 | 388            | 1229 | 43                 | 1143 | 130        | 2251 | 237           | 2390 |
| dq (cm)                                                       | 16,4           | 67,9 | 20,0        | 54,9 | 13,3       | 46,0 | 21,9           | 35,2 | 15,8               | 86,4 | 14,4       | 51,9 | 13,6          | 54,4 |
| V (m <sup>3</sup> ha <sup>-1</sup> )                          | 225            | 1209 | 248         | 1279 | 234        | 725  | 188            | 814  | 137                | 764  | 116        | 904  | 141           | 1637 |
| PAI Volume (m <sup>3</sup> ha <sup>-1</sup> a <sup>-1</sup> ) | 4,0            | 41,5 | 3,5         | 34,4 | 8,0        | 19,0 | 3,8            | 21,5 | 1,9                | 17,2 | 1,7        | 32,8 | 1,8           | 60,5 |
| TY Volume (m <sup>3</sup> ha <sup>-1</sup> )                  | 370            | 1768 | 415         | 1677 | 294        | 1154 | 313            | 949  | 218                | 1468 | 195        | 1314 | 234           | 2460 |
| Biomass (t ha <sup>-1</sup> )                                 | 182            | 1165 | 121         | 611  | 124        | 368  | 91             | 396  | 133                | 1013 | 57         | 434  | 74            | 826  |
| PAI Biomass (t ha <sup>-1</sup> a <sup>-1</sup> )             | 3,9            | 40,7 | 1,6         | 16,1 | 4,1        | 9,8  | 1,8            | 10,2 | 3,2                | 19,1 | 0,8        | 15,6 | 0,8           | 30,6 |
| TY Biomass (t ha <sup>-1</sup> )                              | 291            | 1776 | 204         | 803  | 156        | 588  | 152            | 462  | 209                | 1877 | 97         | 632  | 123           | 1246 |

\*Abbreviations:

N: Number of trees per ha; dq: quadratic mean diameter (cm); V: standing volume (m<sup>3</sup> ha<sup>-1</sup>); PAI Volume: periodic annual volume increment (m<sup>3</sup> ha<sup>-1</sup> a<sup>-1</sup>); TY Volume: total yield in volume (m<sup>3</sup> ha<sup>-1</sup>), i.e. sum of standing volume and all harvested and mortality volume up to the survey of interest; Biomass: standing above ground biomass (t ha<sup>-1</sup>); PAI Biomass: periodic annual increment of above ground biomass (t ha<sup>-1</sup> a<sup>-1</sup>); TY Biomass: total yield in biomass (t ha<sup>-1</sup>), definition as for TY Volume



Supplementary Table 5. Fit results of the species overarching non-regional growth trend model (Equation 7) with 5,815 observations from 642 plots in 415 experiments\*

| <b>Fixed Effect</b> | <b>Parameter</b> | <b>Estimate</b> | <b>Std. Error</b> | <b>p</b> | <b>sig.</b> |
|---------------------|------------------|-----------------|-------------------|----------|-------------|
|                     | $a_0$            | -8.8424         | 1.4981            | 0.0000   | ***         |
| ln(AGE)             | $a_1$            | 0.5486          | 0.0661            | 0.0000   | ***         |
| AGE                 | $a_2$            | 0.3820          | 0.1615            | 0.0181   | *           |
| EYEAR               | $a_3$            | 4.8760          | 0.7183            | 0.0000   | ***         |
| AGE·EYEAR           | $a_4$            | -0.2612         | 0.0886            | 0.0032   | **          |

  

| <b>Random Effects</b> | <b>Parameter</b> | <b>Std. dev.</b> |
|-----------------------|------------------|------------------|
|                       | $b_i$            | $\tau_1$ 0.2571  |
|                       | $b_s$            | $\tau_2$ 0.3256  |
|                       | $c_s$            | $\tau_2$ 0.0684  |

  

| <b>Residual</b>       | <b>Std. dev.</b> |
|-----------------------|------------------|
| $\varepsilon_{ijk,s}$ | $\sigma$ 0.3450  |

\*Significance levels ‘\*’, ‘\*\*’, ‘\*\*\*’ correspond to  $p < 0.05$ ,  $0.01$ , and  $0.001$ , respectively.

Note, that in the fixed effects connected with the parameters  $a_2$  and  $a_4$ , AGE, is the actual stand age divided by 10; in the fixed effects connected with parameters  $a_3$  and  $a_4$ , EYEAR is the actual calendar year of stand establishment divided by 1000. These transformations improved the convergence of the model fit algorithm.

Supplementary Table 6. Fit results of the non-regional growth trend model for Norway spruce (Equation 8) with 1,758 observations from 202 plots in 134 experiments\*

| <b>Fixed Effect</b>   | <b>Parameter</b> | <b>Estimate</b>  | <b>Std. Error</b> | <b>p</b> | <b>sig.</b> |
|-----------------------|------------------|------------------|-------------------|----------|-------------|
|                       | $a_0$            | -1.7709          | 1.2473            | 0.1576   |             |
| ln(AGE)               | $a_1$            | 0.3194           | 0.0841            | 0.0002   | ***         |
| AGE                   | $a_2$            | -0.0701          | 0.0137            | 0.0000   | ***         |
| EYEAR                 | $a_3$            | 1.6309           | 0.6352            | 0.0113   | *           |
| <hr/>                 |                  |                  |                   |          |             |
| <b>Random Effects</b> | <b>Parameter</b> | <b>Std. dev.</b> |                   |          |             |
|                       | $b_i$            | $\tau_1$         | 0.2476            |          |             |
|                       | $b_{ij}$         | $\tau_4$         | 0.0236            |          |             |
| <hr/>                 |                  |                  |                   |          |             |
| <b>Residual</b>       |                  | <b>Std. dev.</b> |                   |          |             |
| $\varepsilon_{ijk}$   |                  | $\sigma$         | 0.2876            |          |             |

\*Significance levels ‘\*’, ‘\*\*’, ‘\*\*\*’ correspond to  $p < 0.05$ , 0.01, and 0.001, respectively.

Note, that in the fixed effect connected with the parameter  $a_2$ , AGE, is the actual stand age divided by 10; in the fixed effect connected with parameter  $a_3$ , EYEAR is the actual calendar year of stand establishment divided by 1000. These transformations improved the convergence of the model fit algorithm.

Supplementary Table 7. Fit results of the non-regional growth trend model for Scots pine (Equation 8) with 1,453 observations from 189 plots in 120 experiments\*

| <b>Fixed Effect</b>   | <b>Parameter</b>    | <b>Estimate</b>  | <b>Std. Error</b> | <b>p</b> | <b>sig.</b> |
|-----------------------|---------------------|------------------|-------------------|----------|-------------|
|                       | $a_0$               | -5.4555          | 1.9598            | 0.0061   | **          |
| ln(AGE)               | $a_1$               | 0.4724           | 0.0890            | 0.0000   | ***         |
| AGE                   | $a_2$               | -0.1125          | 0.0142            | 0.0000   | ***         |
| EYEAR                 | $a_3$               | 2.9702           | 1.0040            | 0.0037   | **          |
| <hr/>                 |                     |                  |                   |          |             |
| <b>Random Effects</b> | <b>Parameter</b>    | <b>Std. dev.</b> |                   |          |             |
|                       | $b_i$               | $\tau_1$         | 0.2714            |          |             |
| <hr/>                 |                     |                  |                   |          |             |
| <b>Residual</b>       |                     | <b>Std. dev.</b> |                   |          |             |
|                       | $\varepsilon_{ijk}$ | $\sigma$         | 0.3402            |          |             |

\*Significance levels ‘\*’, ‘\*\*’, ‘\*\*\*’ correspond to  $p < 0.05$ , 0.01, and 0.001, respectively.

Note, that in the fixed effect connected with the parameter  $a_2$ , AGE, is the actual stand age divided by 10; in the fixed effect connected with parameter  $a_3$ , EYEAR is the actual calendar year of stand establishment divided by 1000. These transformations improved the convergence of the model fit algorithm.

Supplementary Table 8. Fit results of the non-regional growth trend model for European beech (Equation 8) with 1,098 observations from 97 plots in 60 experiments\*

| <b>Fixed Effect</b>   | <b>Parameter</b> | <b>Estimate</b>  | <b>Std. Error</b> | <b>p</b> | <b>sig.</b> |
|-----------------------|------------------|------------------|-------------------|----------|-------------|
|                       | $a_0$            | -10.7755         | 1.9281            | 0.0000   | ***         |
| ln(AGE)               | $a_1$            | 0.6905           | 0.1304            | 0.0000   | ***         |
| AGE                   | $a_2$            | -0.0367          | 0.0166            | 0.0275   | *           |
| EYEAR                 | $a_3$            | 5.5864           | 1.0077            | 0.0000   | ***         |
| <hr/>                 |                  |                  |                   |          |             |
| <b>Random Effects</b> | <b>Parameter</b> | <b>Std. dev.</b> |                   |          |             |
|                       | $b_i$            | $\tau_1$         | 0.2680            |          |             |
|                       | $b_{ij}$         | $\tau_4$         | 0.0162            |          |             |
| <hr/>                 |                  |                  |                   |          |             |
| <b>Residual</b>       |                  | <b>Std. dev.</b> |                   |          |             |
| $\varepsilon_{ijk}$   |                  | $\sigma$         | 0.3829            |          |             |

\*Significance levels ‘\*’, ‘\*\*’, ‘\*\*\*’ correspond to  $p < 0.05$ , 0.01, and 0.001, respectively.

Note, that in the fixed effect connected with the parameter  $a_2$ , AGE, is the actual stand age divided by 10; in the fixed effect connected with parameter  $a_3$ , EYEAR is the actual calendar year of stand establishment divided by 1000. These transformations improved the convergence of the model fit algorithm.

Supplementary Table 9. Fit results of the non-regional growth trend model for sessile/common oak (Equation 8) with 1,126 observations from 103 plots in 63 experiments \*

| <b>Fixed Effect</b>   | <b>Parameter</b>    | <b>Estimate</b>  | <b>Std. Error</b> | <b>p</b> | <b>sig.</b> |
|-----------------------|---------------------|------------------|-------------------|----------|-------------|
|                       | $a_0$               | -5.8960          | 1.1246            | 0.0000   | ***         |
| ln(AGE)               | $a_1$               | 0.2949           | 0.0341            | 0.0000   | ***         |
| EYEAR                 | $a_3$               | 3.6881           | 0.5491            | 0.0000   | ***         |
| <b>Random Effects</b> | <b>Parameter</b>    | <b>Std. dev.</b> |                   |          |             |
|                       | $b_i$               | $\tau_1$         | 0.1355            |          |             |
|                       | $b_{ij}$            | $\tau_4$         | 0.0499            |          |             |
|                       | <b>Residual</b>     | <b>Std. dev.</b> |                   |          |             |
|                       | $\varepsilon_{ijk}$ | $\sigma$         | 0.3512            |          |             |

\*Significance levels ‘\*’, ‘\*\*’, ‘\*\*\*’ correspond to  $p < 0.05$ , 0.01, and 0.001, respectively.

Note, that in the fixed effect connected with the parameter  $a_2$ , AGE, is the actual stand age divided by 10; in the fixed effect connected with parameter  $a_3$ , EYEAR is the actual calendar year of stand establishment divided by 1000. These transformations improved the convergence of the model fit algorithm.

Supplementary Table 10. Fit results for the growth trends of Scots pine by trend classes (Equation 9)\*

| <b>Fixed Effect</b>   | <b>Parameter</b>    | <b>Estimate</b>  | <b>Std. Error</b> | <b>p</b> | <b>sig.</b> |
|-----------------------|---------------------|------------------|-------------------|----------|-------------|
|                       | a <sub>0</sub>      | 13.5457          | 9.4849            | 0.1544   |             |
| AGE                   | a <sub>2</sub>      | -0.1382          | 0.0303            | 0.0000   | ***         |
| EYEAR                 | a <sub>3</sub>      | -5.7877          | 4.8834            | 0.2370   |             |
| TCLASS(0)             | a <sub>5</sub>      | -22.0814         | 9.7064            | 0.0237   | *           |
| TCLASS(1)             | a <sub>6</sub>      | -16.3549         | 10.0050           | 0.1033   |             |
| TCLASS(2)             | a <sub>7</sub>      | -36.9593         | 13.2319           | 0.0057   | **          |
| AGE·TCLASS(0)         | a <sub>8</sub>      | 0.1007           | 0.0310            | 0.0012   | **          |
| AGE·TCLASS(1)         | a <sub>9</sub>      | 0.0952           | 0.0316            | 0.0027   | **          |
| AGE·TCLASS(2)         | a <sub>10</sub>     | 0.1075           | 0.0362            | 0.0031   | **          |
| EYEAR·TCLASS(0)       | a <sub>11</sub>     | 11.1441          | 4.9995            | 0.0267   | *           |
| EYEAR·TCLASS(1)       | a <sub>12</sub>     | 8.2207           | 5.1576            | 0.1122   |             |
| EYEAR·TCLASS(2)       | a <sub>13</sub>     | 18.6628          | 6.8115            | 0.0067   | **          |
| <hr/>                 |                     |                  |                   |          |             |
| <b>Random Effects</b> | <b>Parameter</b>    | <b>Std. dev.</b> |                   |          |             |
|                       | b <sub>i</sub>      | $\tau_1$         | 0.2108            |          |             |
| <hr/>                 |                     |                  |                   |          |             |
|                       | <b>Residual</b>     | <b>Std. dev.</b> |                   |          |             |
|                       | $\varepsilon_{ijk}$ | $\sigma$         | 0.3446            |          |             |

\*Significance levels ‘\*’, ‘\*\*’, ‘\*\*\*’ correspond to  $p < 0.05$ , 0.01, and 0.001, respectively.

Note, that AGE, is the actual stand age divided by 10, and EYEAR is the actual calendar year of stand establishment divided by 1000. These transformations improved the convergence of the model fit algorithm.

### Regression Slopes $\ln(\text{CVP}) \sim \text{Calendar Year}$

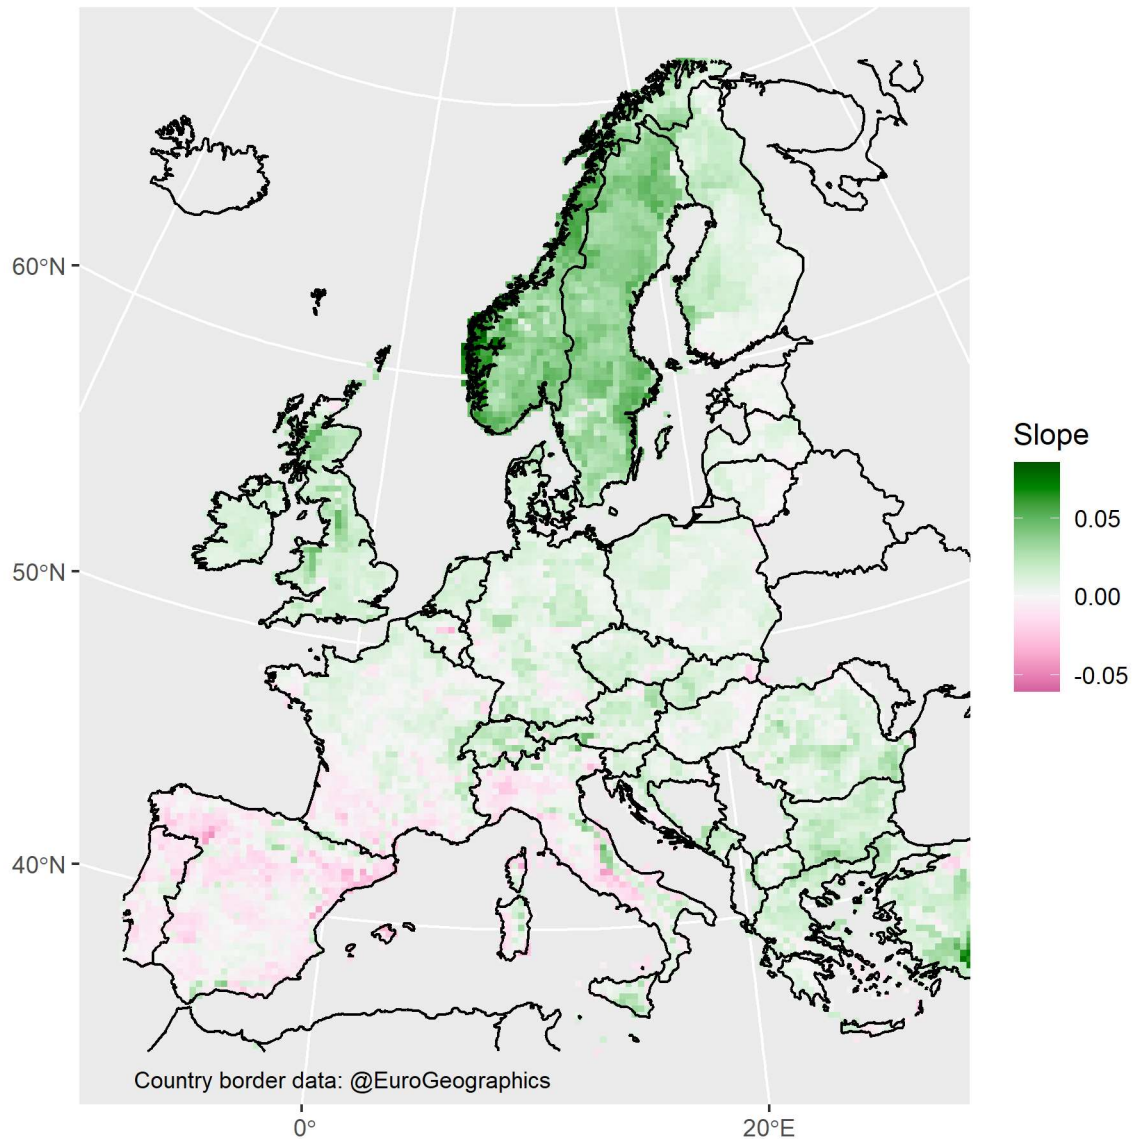

Supplementary Figure 1. Grid-point-wise regression slopes (parameter  $a_1$  in Equation 3) indicating trends in the climate-vegetation-productivity index CVP across Europe in the period of 1975-2017 on a 25 x 25 km raster. Positive slopes indicate a trend towards more favourable climate conditions for forest growth; negative slopes indicate deteriorating conditions. These slope values were the basis for defining the trend classes shown in Figure 2.

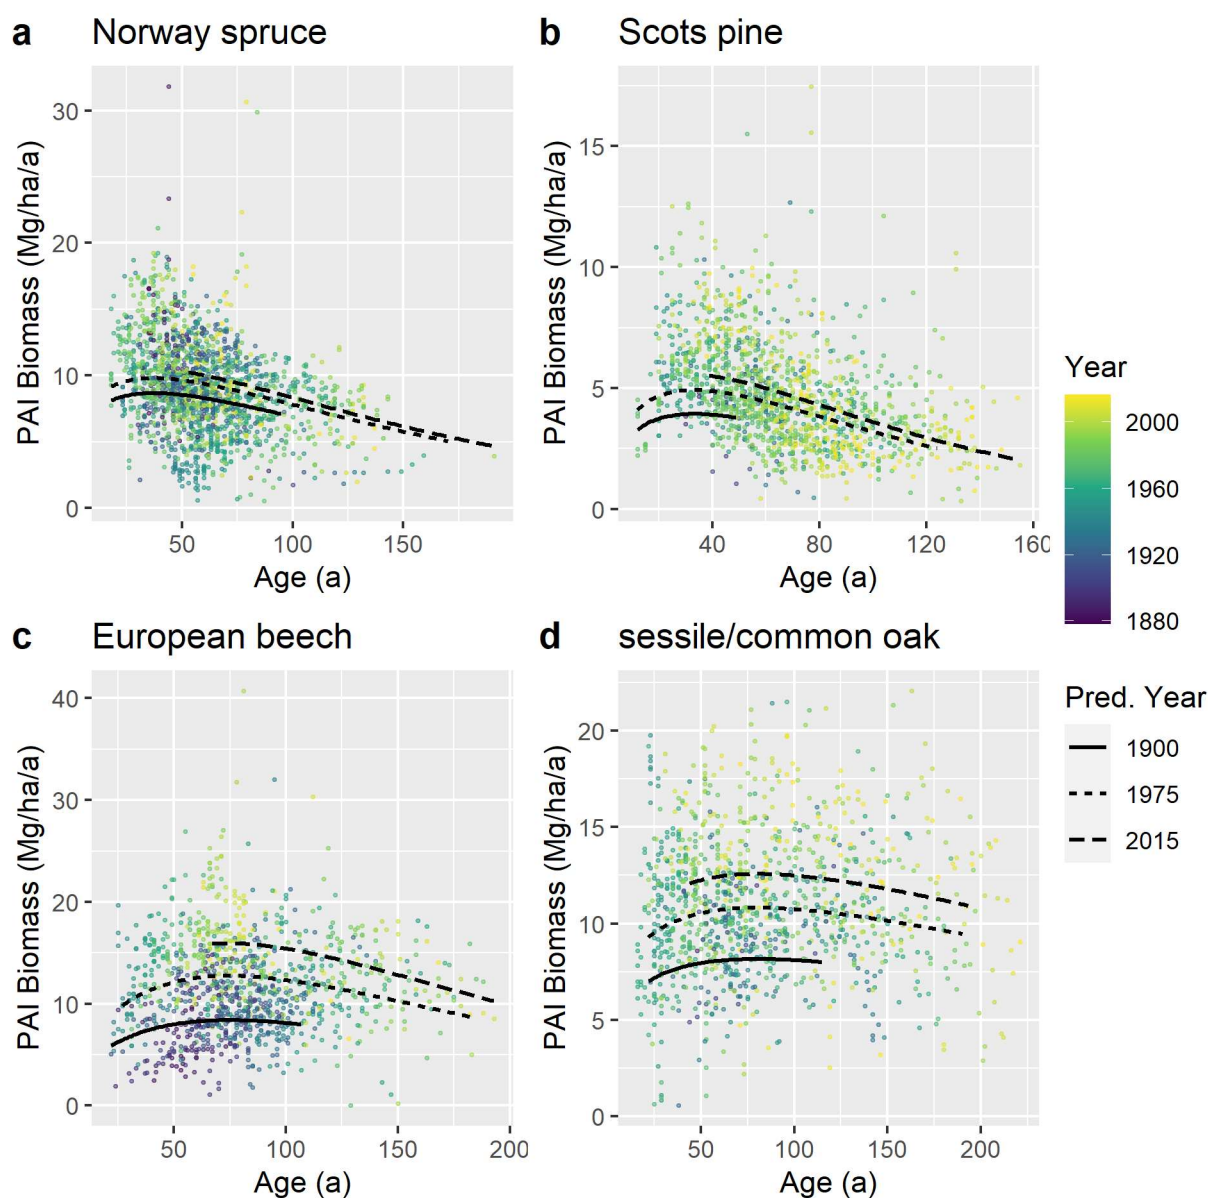

Supplementary Figure 2. Overall growth trend for the main species Norway spruce (a, 1758 observations, 202 plots, 134 trials), Scots pine (b, 1453 obs., 189 plots, 120 trials), European beech (c, 1098 obs., 97 plots, 60 trials) and sessile/common oak (d, 1126 obs., 103 plots, 63 trials). The model lines are estimates based on the fitted fixed effects of Equation 8 (see Supplementary Tables 6-9). Note the unimodal shape of the estimates for oak, even if there is only a positive age effect in the fitted model (Supplementary Table 9). This occurs because each model line relates to stands at different ages in one specific prediction year, not to one stand getting older.



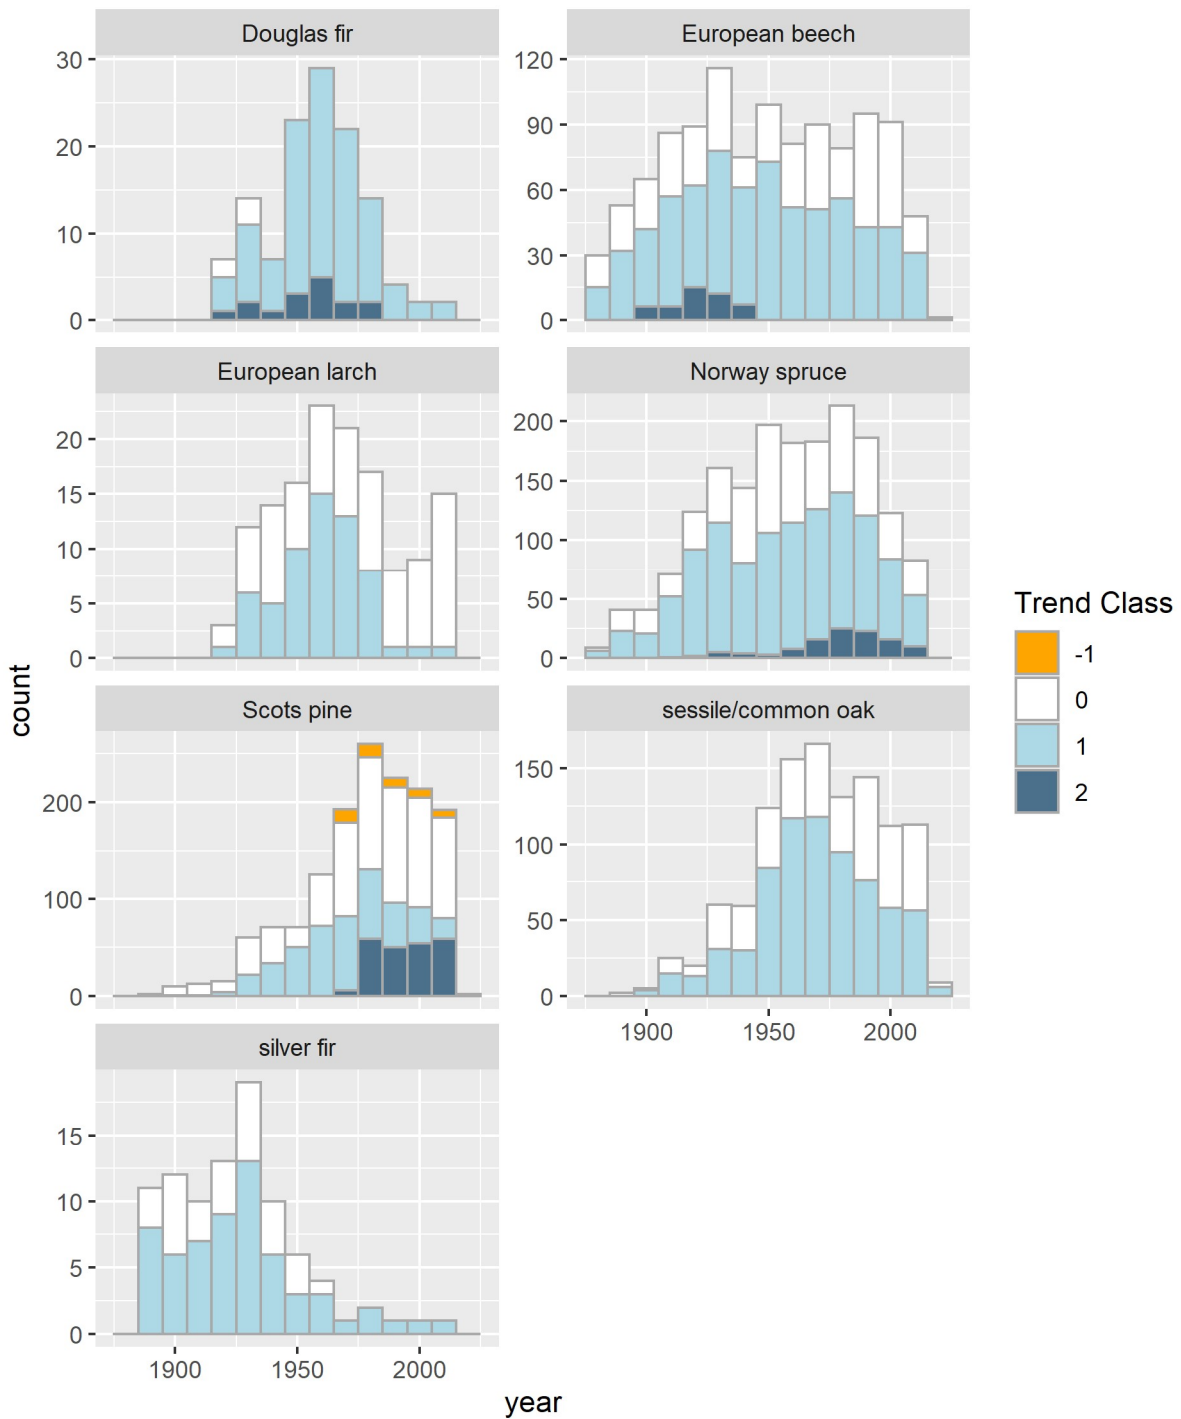

Supplementary Figure 3. Histograms of surveys by calendar year (i.e. decade), species, and trend class. The trend classes are colour-coded as in Figure 2. Numbers of surveys: Douglas fir, 138; European beech, 1098; European larch, 151; Norway spruce, 1758; Scots pine, 1453; sessile/common oak, 1126; silver fir, 91.

Supplementary Table 11. Overview of the growth and yield characteristics (last survey) of all 642 plots, sorted by species. See Supplementary Table 1 for the names of the data-providing institutions per country. Abbreviations: N: Number of trees per ha; dq: quadratic mean diameter (cm); V: standing volume ( $\text{m}^3 \text{ha}^{-1}$ ); PAI Volume: periodic annual volume increment ( $\text{m}^3 \text{ha}^{-1} \text{a}^{-1}$ ); TY Volume: total yield in volume ( $\text{m}^3/\text{ha}$ ), i.e. sum of standing volume and all harvested and mortality volume up to the survey of interest; Biomass: standing above ground biomass ( $\text{t}/\text{ha}$ ); PAI Biomass: periodic annual increment of above ground biomass ( $\text{t ha}^{-1} \text{a}^{-1}$ ); TY Biomass: total yield in biomass ( $\text{t ha}^{-1}$ ), definition as for TY Volume

| Species        | Country / Institution | Trial/Plot | Age at last survey (a) | First survey (year) | Last survey (year) | Number of surveys | N ( $\text{ha}^{-1}$ ) | dq (cm) | SDI  | V ( $\text{m}^3 \text{ha}^{-1}$ ) | PAI Volume ( $\text{m}^3 \text{ha}^{-1} \text{a}^{-1}$ ) | TY Volume ( $\text{m}^3 \text{ha}^{-1}$ ) | Biomass ( $\text{t ha}^{-1}$ ) | PAI Biomass ( $\text{t ha}^{-1} \text{a}^{-1}$ ) | TY Biomass ( $\text{t ha}^{-1}$ ) |
|----------------|-----------------------|------------|------------------------|---------------------|--------------------|-------------------|------------------------|---------|------|-----------------------------------|----------------------------------------------------------|-------------------------------------------|--------------------------------|--------------------------------------------------|-----------------------------------|
| European beech | Austria               | 204/1      | 103                    | 1895                | 1943               | 17                | 460                    | 30.5    | 633  | 394                               | 6.0                                                      | 666                                       | 367                            | 7.6                                              | 602                               |
| European beech | Austria               | 204/2      | 99                     | 1895                | 1939               | 16                | 468                    | 31.4    | 675  | 421                               | 9.0                                                      | 697                                       | 394                            | 9.6                                              | 633                               |
| European beech | Austria               | 204/3      | 99                     | 1895                | 1939               | 16                | 332                    | 33.9    | 541  | 353                               | 9.0                                                      | 696                                       | 336                            | 10.2                                             | 637                               |
| European beech | Austria               | 315/13     | 66                     | 1996                | 2014               | 5                 | 1308                   | 20.8    | 974  | 540                               | 14.2                                                     | 605                                       | 461                            | 14.4                                             | 515                               |
| European beech | Austria               | 315/33     | 66                     | 1996                | 2014               | 5                 | 1600                   | 18.4    | 978  | 480                               | 16.0                                                     | 531                                       | 399                            | 15.5                                             | 440                               |
| European beech | Denmark               | DS/1       | 71                     | 1956                | 1978               | 6                 | 169                    | 43.0    | 404  | 430                               | 20.3                                                     | 749                                       | 432                            | 22.2                                             | 739                               |
| European beech | Denmark               | DA/1       | 134                    | 1903                | 1977               | 20                | 370                    | 39.7    | 779  | 936                               | 15.5                                                     | 1158                                      | 924                            | 16.8                                             | 1136                              |
| European beech | Denmark               | DEX/1      | 188                    | 1946                | 1981               | 9                 | 135                    | 60.2    | 552  | 820                               | 9.4                                                      | 1186                                      | 888                            | 12.2                                             | 1281                              |
| European beech | Denmark               | DP/10      | 97                     | 1938                | 2015               | 32                | 949                    | 28.3    | 1158 | 1013                              | 16.2                                                     | 1221                                      | 927                            | 17.3                                             | 1105                              |
| European beech | Denmark               | DP/11      | 80                     | 1938                | 1998               | 18                | 529                    | 30.5    | 728  | 668                               | 5.9                                                      | 1063                                      | 622                            | 6.1                                              | 957                               |
| European beech | Denmark               | DP/3       | 63                     | 1938                | 1981               | 13                | 644                    | 25.4    | 658  | 470                               | 19.0                                                     | 787                                       | 419                            | 18.5                                             | 678                               |
| European beech | Denmark               | DP/5       | 49                     | 1938                | 1967               | 10                | 886                    | 19.3    | 586  | 310                               | 21.9                                                     | 509                                       | 261                            | 20.5                                             | 416                               |
| European beech | Denmark               | DQ/A1      | 46                     | 1941                | 1962               | 10                | 798                    | 19.0    | 512  | 267                               | 18.7                                                     | 463                                       | 223                            | 16.9                                             | 377                               |
| European beech | Denmark               | DQ/A2      | 43                     | 1941                | 1959               | 9                 | 858                    | 17.7    | 494  | 239                               | 16.9                                                     | 387                                       | 197                            | 15.2                                             | 312                               |
| European beech | Denmark               | DQ/D1      | 43                     | 1941                | 1959               | 9                 | 747                    | 19.0    | 480  | 240                               | 16.8                                                     | 411                                       | 201                            | 15.5                                             | 335                               |
| European beech | Denmark               | DQ/D2      | 40                     | 1941                | 1956               | 8                 | 997                    | 16.4    | 508  | 225                               | 17.6                                                     | 370                                       | 182                            | 14.8                                             | 291                               |
| European beech | Denmark               | DQ/E2      | 84                     | 1941                | 2000               | 20                | 821                    | 28.7    | 1024 | 900                               | 7.8                                                      | 1051                                      | 826                            | 9.0                                              | 954                               |
| European beech | Denmark               | DQ/E3      | 81                     | 1941                | 1997               | 12                | 986                    | 30.8    | 1380 | 1209                              | 41.5                                                     | 1281                                      | 1127                           | 40.7                                             | 1191                              |
| European beech | Denmark               | DV/2       | 119                    | 1938                | 1989               | 12                | 440                    | 34.9    | 750  | 813                               | 25.5                                                     | 1446                                      | 780                            | 25.3                                             | 1378                              |
| European beech | Denmark               | S/1        | 118                    | 1887                | 1930               | 8                 | 162                    | 47.2    | 449  | 542                               | 13.1                                                     | 926                                       | 556                            | 14.6                                             | 931                               |

|                |            |                                    |     |      |      |    |     |      |     |      |      |      |      |      |      |
|----------------|------------|------------------------------------|-----|------|------|----|-----|------|-----|------|------|------|------|------|------|
| European beech | England    | Nettlebed - Lower Common Wood/1256 | 138 | 1949 | 1991 | 8  | 290 | 38.9 | 588 | 409  | 7.0  | 506  | 402  | 7.2  | 494  |
| European beech | England    | Queen & College Wood/1373          | 193 | 1953 | 2006 | 9  | 129 | 51.0 | 405 | 345  | 7.5  | 591  | 360  | 8.5  | 603  |
| European beech | France     | CampCusson/2                       | 101 | 1924 | 1981 | 12 | 248 | 41.6 | 561 | 572  | 8.7  | 926  | 571  | 10.9 | 900  |
| European beech | France     | CampCusson/4                       | 97  | 1924 | 1977 | 10 | 275 | 42.2 | 637 | 653  | 11.3 | 1078 | 653  | 12.2 | 1047 |
| European beech | France     | Charlemagne/1                      | 134 | 1904 | 1989 | 17 | 232 | 50.1 | 707 | 934  | 14.6 | 1492 | 971  | 16.7 | 1513 |
| European beech | France     | Charlemagne/3                      | 151 | 1904 | 2006 | 20 | 304 | 46.5 | 822 | 1076 | 13.0 | 1768 | 1100 | 14.4 | 1776 |
| European beech | France     | Chavigny/1                         | 138 | 1904 | 1995 | 18 | 200 | 51.8 | 643 | 857  | 11.2 | 1466 | 898  | 13.0 | 1495 |
| European beech | France     | Chavigny/2                         | 109 | 1904 | 1966 | 13 | 240 | 44.6 | 608 | 685  | 12.8 | 1080 | 694  | 14.4 | 1065 |
| European beech | France     | Chretienette/2                     | 118 | 1922 | 1978 | 10 | 188 | 51.4 | 598 | 797  | 10.1 | 1183 | 834  | 11.7 | 1212 |
| European beech | France     | Chretienette/3                     | 118 | 1922 | 1978 | 10 | 252 | 46.1 | 673 | 830  | 9.8  | 1223 | 847  | 11.4 | 1241 |
| European beech | France     | Epiceas/1                          | 150 | 1904 | 2006 | 22 | 184 | 55.3 | 658 | 954  | 16.0 | 1541 | 1014 | 18.1 | 1587 |
| European beech | France     | Epiceas/3                          | 150 | 1904 | 2006 | 22 | 328 | 46.6 | 891 | 1139 | 15.1 | 1597 | 1165 | 16.9 | 1603 |
| European beech | France     | Faite/2                            | 91  | 1922 | 1978 | 12 | 440 | 31.2 | 627 | 518  | 11.4 | 810  | 484  | 11.6 | 734  |
| European beech | France     | Faite/3                            | 68  | 1922 | 1955 | 9  | 970 | 20.7 | 715 | 389  | 18.3 | 533  | 332  | 16.7 | 448  |
| European beech | France     | PreDesSeigneurs/1                  | 173 | 1922 | 1968 | 9  | 100 | 67.9 | 497 | 846  | 11.4 | 1423 | 942  | 13.8 | 1561 |
| European beech | France     | SouillyB/1                         | 81  | 1963 | 2009 | 18 | 580 | 32.1 | 868 | 736  | 9.9  | 890  | 693  | 10.6 | 830  |
| European beech | France     | SouillyB/3                         | 81  | 1963 | 2009 | 18 | 515 | 34.0 | 845 | 753  | 14.0 | 908  | 718  | 15.4 | 858  |
| European beech | France     | SouillyB/4                         | 81  | 1963 | 2009 | 18 | 710 | 30.2 | 961 | 789  | 15.4 | 913  | 732  | 16.6 | 841  |
| European beech | France     | SouillyD/1                         | 81  | 1963 | 2009 | 18 | 520 | 31.0 | 733 | 615  | 20.7 | 849  | 575  | 20.6 | 777  |
| European beech | France     | SouillyD/2                         | 81  | 1963 | 2009 | 18 | 470 | 32.5 | 715 | 616  | 18.4 | 857  | 581  | 18.7 | 794  |
| European beech | France     | SouillyD/3                         | 81  | 1963 | 2009 | 18 | 475 | 32.2 | 712 | 610  | 16.6 | 867  | 574  | 17.3 | 800  |
| European beech | France     | SouillyD/4                         | 81  | 1963 | 2009 | 18 | 470 | 32.8 | 728 | 634  | 19.2 | 953  | 600  | 19.8 | 883  |
| European beech | Germany BW | Bu 9/1                             | 97  | 1874 | 1925 | 7  | 584 | 22.9 | 507 | 262  | 6.8  | 426  | 229  | 6.4  | 365  |
| European beech | Germany BW | Bu 13/1                            | 98  | 1875 | 1926 | 9  | 672 | 21.7 | 535 | 254  | 9.1  | 391  | 219  | 8.7  | 326  |
| European beech | Germany BW | Bu 17/1                            | 109 | 1875 | 1922 | 7  | 392 | 30.5 | 539 | 462  | 10.8 | 752  | 430  | 10.9 | 687  |
| European beech | Germany BW | Bu 18/1                            | 109 | 1875 | 1922 | 7  | 372 | 31.3 | 534 | 458  | 12.0 | 736  | 429  | 12.1 | 678  |
| European beech | Germany BW | Bu 21/1                            | 97  | 1875 | 1930 | 9  | 648 | 22.4 | 543 | 274  | 7.3  | 466  | 238  | 7.1  | 390  |
| European beech | Germany BW | Bu 22/1                            | 93  | 1875 | 1926 | 8  | 628 | 23.7 | 576 | 315  | 8.6  | 485  | 277  | 8.3  | 418  |
| European beech | Germany BW | Bu 25/1                            | 112 | 1875 | 1953 | 13 | 370 | 31.2 | 528 | 378  | 6.7  | 623  | 353  | 6.7  | 564  |

|                |             |             |     |      |      |    |      |      |      |      |      |      |      |      |      |
|----------------|-------------|-------------|-----|------|------|----|------|------|------|------|------|------|------|------|------|
| European beech | Germany BW  | Bu 31/1     | 104 | 1875 | 1928 | 9  | 312  | 38.3 | 619  | 584  | 17.8 | 970  | 572  | 19.3 | 922  |
| European beech | Germany BW  | Bu 35/1     | 105 | 1875 | 1927 | 8  | 380  | 31.6 | 553  | 412  | 10.3 | 642  | 386  | 10.7 | 590  |
| European beech | Germany BW  | Bu 66/1     | 92  | 1876 | 1922 | 7  | 704  | 22.6 | 599  | 325  | 10.1 | 538  | 283  | 9.3  | 462  |
| European beech | Germany BW  | Bu 91/1     | 105 | 1876 | 1932 | 9  | 428  | 31.2 | 611  | 453  | 9.5  | 734  | 424  | 10.3 | 672  |
| European beech | Germany BW  | Bu 101/1    | 71  | 1876 | 1906 | 5  | 476  | 28.4 | 584  | 400  | 9.7  | 555  | 366  | 10.0 | 503  |
| European beech | Germany BW  | Bu 107/1    | 111 | 1877 | 1935 | 12 | 412  | 34.0 | 675  | 621  | 12.4 | 1003 | 592  | 13.3 | 929  |
| European beech | Germany BW  | Bu 113/1    | 113 | 1877 | 1930 | 9  | 544  | 28.2 | 660  | 487  | 9.5  | 788  | 445  | 10.1 | 700  |
| European beech | Germany BW  | Bu 123/1    | 121 | 1877 | 1930 | 9  | 288  | 36.5 | 529  | 451  | 9.0  | 782  | 437  | 10.0 | 737  |
| European beech | Germany BW  | Bu 132/1    | 102 | 1877 | 1928 | 8  | 376  | 28.9 | 474  | 329  | 11.3 | 568  | 302  | 11.3 | 511  |
| European beech | Germany BW  | Bu 153/1    | 96  | 1877 | 1913 | 7  | 464  | 27.4 | 538  | 339  | 9.5  | 563  | 308  | 9.2  | 502  |
| European beech | Germany BW  | Bu 162/1    | 101 | 1877 | 1922 | 7  | 624  | 23.8 | 577  | 307  | 6.5  | 462  | 270  | 6.1  | 397  |
| European beech | Germany BW  | Bu 253/1    | 93  | 1889 | 1940 | 9  | 608  | 23.1 | 536  | 323  | 9.7  | 493  | 283  | 9.1  | 421  |
| European beech | Germany BW  | Bu 253/2    | 93  | 1884 | 1940 | 10 | 428  | 27.4 | 496  | 342  | 8.8  | 566  | 310  | 8.8  | 504  |
| European beech | Germany BW  | Bu 253/3    | 78  | 1884 | 1925 | 6  | 488  | 23.6 | 445  | 245  | 11.3 | 385  | 215  | 11.0 | 333  |
| European beech | Germany GOE | ID 042210/2 | 140 | 1890 | 1982 | 16 | 300  | 41.2 | 669  | 709  | 13.2 | 958  | 706  | 13.9 | 930  |
| European beech | Germany GOE | ID 042210/5 | 130 | 1930 | 1972 | 9  | 348  | 36.2 | 630  | 593  | 10.5 | 731  | 573  | 11.3 | 703  |
| European beech | Germany GOE | ID 042210/6 | 145 | 1950 | 1987 | 8  | 144  | 54.9 | 509  | 647  | 5.6  | 960  | 687  | 7.6  | 1005 |
| European beech | Germany GOE | ID 042210/7 | 145 | 1950 | 1987 | 8  | 168  | 50.6 | 521  | 636  | 10.4 | 974  | 663  | 12.5 | 1000 |
| European beech | Germany GOE | ID 080210/2 | 109 | 1951 | 2004 | 12 | 400  | 33.1 | 628  | 464  | 7.8  | 744  | 440  | 8.2  | 689  |
| European beech | Germany GOE | ID 080210/3 | 117 | 1951 | 2012 | 14 | 687  | 29.7 | 906  | 701  | 13.2 | 938  | 648  | 13.0 | 857  |
| European beech | Germany GOE | ID 583210/3 | 122 | 1898 | 1968 | 13 | 610  | 33.0 | 952  | 871  | 20.3 | 1147 | 825  | 20.7 | 1074 |
| European beech | Germany GOE | ID H10210/1 | 168 | 1886 | 2014 | 23 | 217  | 48.9 | 637  | 907  | 12.8 | 1398 | 938  | 14.1 | 1413 |
| European beech | Germany GOE | ID H10210/2 | 147 | 1886 | 1993 | 18 | 184  | 47.8 | 521  | 657  | 7.2  | 1156 | 676  | 8.3  | 1143 |
| European beech | Germany GOE | ID J51210/1 | 68  | 1976 | 2014 | 11 | 1474 | 19.8 | 1014 | 534  | 13.2 | 619  | 451  | 12.6 | 521  |
| European beech | Germany GOE | ID J51210/5 | 68  | 1976 | 2014 | 11 | 1578 | 19.4 | 1050 | 529  | 11.2 | 580  | 445  | 10.6 | 487  |
| European beech | Germany MUE | 111/4       | 132 | 1954 | 2008 | 9  | 296  | 37.4 | 565  | 627  | 13.8 | 875  | 611  | 14.4 | 838  |
| European beech | Germany MUE | 43845       | 188 | 1870 | 2010 | 18 | 378  | 44.1 | 940  | 1107 | 8.2  | 1434 | 1119 | 9.1  | 1422 |
| European beech | Germany MUE | 43876       | 178 | 1870 | 2000 | 17 | 219  | 51.5 | 699  | 924  | 10.1 | 1438 | 967  | 12.4 | 1456 |
| European beech | Germany MUE | 232/4       | 128 | 1961 | 2015 | 10 | 187  | 49.0 | 551  | 635  | 5.5  | 1066 | 657  | 6.6  | 1071 |

|                |             |                               |     |      |      |    |      |      |      |     |      |      |     |      |      |
|----------------|-------------|-------------------------------|-----|------|------|----|------|------|------|-----|------|------|-----|------|------|
| European beech | Germany MUE | 43855                         | 153 | 1870 | 1981 | 15 | 356  | 36.9 | 665  | 593 | 10.2 | 884  | 576 | 11.2 | 830  |
| European beech | Germany MUE | 43886                         | 164 | 1870 | 1992 | 16 | 292  | 38.4 | 581  | 507 | 9.6  | 846  | 497 | 10.2 | 808  |
| European beech | Germany MUE | 43856                         | 144 | 1871 | 1967 | 14 | 425  | 37.0 | 797  | 796 | 10.8 | 1046 | 773 | 11.4 | 998  |
| European beech | Germany MUE | 43887                         | 144 | 1871 | 1967 | 14 | 303  | 39.9 | 642  | 678 | 11.2 | 1069 | 670 | 11.9 | 1027 |
| European beech | Germany MUE | 43857                         | 182 | 1881 | 2014 | 18 | 272  | 47.3 | 757  | 962 | 8.1  | 1348 | 987 | 9.0  | 1347 |
| European beech | Germany MUE | 43888                         | 152 | 1881 | 1984 | 15 | 219  | 45.3 | 569  | 706 | 9.3  | 1203 | 718 | 10.2 | 1179 |
| European beech | Germany MUE | 312/2                         | 89  | 1959 | 1984 | 5  | 596  | 23.9 | 554  | 316 | 13.3 | 493  | 278 | 12.7 | 428  |
| European beech | Germany MUE | 91/4                          | 85  | 1971 | 2012 | 7  | 709  | 25.8 | 748  | 569 | 18.3 | 865  | 510 | 17.3 | 761  |
| European beech | Poland      | SCH_E/33                      | 108 | 1890 | 1933 | 7  | 204  | 41.1 | 453  | 423 | 9.5  | 725  | 421 | 10.5 | 714  |
| European beech | Poland      | SCH_E/34                      | 116 | 1890 | 1941 | 9  | 212  | 39.6 | 444  | 402 | 13.3 | 732  | 397 | 14.4 | 709  |
| European beech | Poland      | SCH_F/38                      | 120 | 1929 | 2016 | 16 | 257  | 45.1 | 661  | 659 | 9.6  | 980  | 669 | 10.3 | 953  |
| European beech | Poland      | SCH_F/39                      | 90  | 1929 | 1986 | 10 | 400  | 32.3 | 603  | 439 | 12.2 | 665  | 414 | 12.8 | 609  |
| European beech | Switzerland | 2019000/1                     | 120 | 1907 | 2009 | 17 | 445  | 39.2 | 915  | 743 | 11.1 | 1051 | 732 | 11.9 | 1010 |
| European beech | Switzerland | 41014000/1                    | 124 | 1890 | 1991 | 16 | 296  | 43.3 | 716  | 656 | 14.3 | 972  | 661 | 16.0 | 942  |
| European beech | Switzerland | 41018000/1                    | 93  | 1890 | 1954 | 12 | 528  | 24.5 | 510  | 262 | 4.0  | 432  | 232 | 3.9  | 376  |
| European beech | Switzerland | 4102/2                        | 91  | 1890 | 1946 | 12 | 560  | 26.9 | 629  | 345 | 6.0  | 580  | 312 | 6.0  | 513  |
| European beech | Switzerland | 4102/4                        | 133 | 1890 | 1986 | 16 | 320  | 43.5 | 777  | 625 | 11.9 | 911  | 630 | 13.1 | 895  |
| European beech | Switzerland | 41036000/1                    | 87  | 1892 | 1950 | 11 | 624  | 25.5 | 645  | 310 | 6.2  | 414  | 277 | 6.2  | 363  |
| European beech | Switzerland | 41193000/1                    | 142 | 1905 | 1991 | 13 | 275  | 43.6 | 672  | 586 | 12.4 | 889  | 591 | 13.8 | 877  |
| Douglas fir    | England     | Achnashellach/3256            | 57  | 1951 | 1982 | 9  | 318  | 45.5 | 833  | 580 | 20.8 | 969  | 276 | 9.7  | 464  |
| Douglas fir    | England     | Bodmin -<br>Tregoffe/1191     | 65  | 1947 | 1992 | 11 | 210  | 53.0 | 702  | 697 | 21.4 | 1029 | 330 | 10.0 | 491  |
| Douglas fir    | England     | Cardinham/1195                | 71  | 1947 | 1993 | 11 | 191  | 51.8 | 615  | 577 | 34.4 | 893  | 273 | 16.1 | 426  |
| Douglas fir    | England     | Cardinham_2/1199              | 44  | 1947 | 1968 | 7  | 517  | 30.5 | 710  | 351 | 17.3 | 593  | 170 | 8.2  | 289  |
| Douglas fir    | England     | Cruach Wood/3098              | 76  | 1932 | 1954 | 7  | 247  | 47.4 | 690  | 647 | 33.0 | 1097 | 307 | 15.6 | 522  |
| Douglas fir    | England     | Culloden/3080                 | 46  | 1926 | 1951 | 6  | 1134 | 24.9 | 1129 | 544 | 19.3 | 722  | 265 | 9.2  | 353  |
| Douglas fir    | England     | Diosgydd/2035                 | 62  | 1948 | 1982 | 9  | 214  | 54.9 | 757  | 720 | 27.9 | 1108 | 340 | 13.0 | 527  |
| Douglas fir    | England     | Dodd Wood/1264                | 32  | 1950 | 1962 | 5  | 725  | 23.4 | 654  | 248 | 20.8 | 415  | 121 | 10.0 | 204  |
| Douglas fir    | England     | Dunster - Aville<br>Wood/1044 | 61  | 1921 | 1955 | 8  | 463  | 41.4 | 1040 | 804 | 30.6 | 1027 | 384 | 14.5 | 491  |
| Douglas fir    | England     | Dunster - Broad<br>Wood/1018  | 67  | 1912 | 1946 | 8  | 291  | 44.6 | 736  | 627 | 19.3 | 1061 | 298 | 9.0  | 507  |

|                |             |                                   |     |      |      |    |      |      |      |      |      |      |     |      |     |
|----------------|-------------|-----------------------------------|-----|------|------|----|------|------|------|------|------|------|-----|------|-----|
| Douglas fir    | England     | Lake Vyrnwy/2010                  | 44  | 1920 | 1940 | 5  | 610  | 29.6 | 799  | 447  | 14.7 | 735  | 217 | 7.0  | 357 |
| Douglas fir    | England     | Monaghty/3183                     | 47  | 1948 | 1974 | 9  | 349  | 40.8 | 767  | 571  | 27.5 | 992  | 273 | 13.0 | 477 |
| Douglas fir    | England     | Mynydd Du/2163                    | 32  | 1959 | 1976 | 5  | 417  | 32.0 | 619  | 349  | 29.7 | 565  | 168 | 14.1 | 274 |
| Douglas fir    | England     | Side Wood/1218                    | 44  | 1947 | 1972 | 7  | 330  | 35.7 | 584  | 406  | 26.1 | 613  | 195 | 12.4 | 296 |
| Douglas fir    | England     | Snoring/1297                      | 49  | 1952 | 1983 | 7  | 1267 | 25.2 | 1287 | 630  | 25.2 | 718  | 307 | 12.1 | 350 |
| Douglas fir    | England     | Tortworth - Ironmill Grove/1019   | 117 | 1918 | 1985 | 11 | 333  | 49.1 | 985  | 975  | 3.5  | 1260 | 463 | 1.6  | 598 |
| Douglas fir    | England     | Tortworth - Ironmill Grove_2/1020 | 103 | 1918 | 1985 | 11 | 292  | 45.8 | 772  | 649  | 6.2  | 748  | 309 | 2.9  | 356 |
| Douglas fir    | Germany BW  | Dgl 5/1                           | 41  | 1911 | 1931 | 6  | 960  | 22.6 | 816  | 450  | 19.7 | 805  | 220 | 9.4  | 395 |
| Douglas fir    | Germany BW  | Dgl 7/1                           | 39  | 1911 | 1931 | 6  | 1310 | 20.0 | 916  | 442  | 24.0 | 731  | 217 | 11.5 | 361 |
| Douglas fir    | Germany BW  | Dgl 98/1                          | 81  | 1957 | 2013 | 11 | 559  | 41.9 | 1280 | 1279 | 29.1 | 1677 | 611 | 13.7 | 803 |
| Silver fir     | Denmark     | OD/1                              | 134 | 1954 | 2012 | 9  | 550  | 38.3 | 1091 | 514  | 14.0 | 611  | 262 | 7.1  | 312 |
| Silver fir     | Germany BW  | Ta 71/1                           | 91  | 1883 | 1922 | 6  | 1125 | 21.2 | 863  | 427  | 14.3 | 724  | 222 | 7.3  | 378 |
| Silver fir     | Germany BW  | Ta 72/1                           | 101 | 1883 | 1933 | 8  | 860  | 24.2 | 816  | 459  | 16.9 | 803  | 238 | 8.6  | 418 |
| Silver fir     | Germany BW  | Ta 73/1                           | 104 | 1883 | 1933 | 8  | 785  | 25.2 | 795  | 465  | 15.9 | 817  | 241 | 8.1  | 425 |
| Silver fir     | Germany BW  | Ta 74/1                           | 108 | 1883 | 1938 | 9  | 727  | 27.5 | 847  | 519  | 13.0 | 916  | 268 | 6.5  | 475 |
| Silver fir     | Germany BW  | Ta 89/1                           | 75  | 1897 | 1943 | 10 | 640  | 29.5 | 835  | 597  | 15.0 | 1015 | 307 | 7.6  | 525 |
| Silver fir     | Germany BW  | Ta 219/B                          | 68  | 1924 | 1949 | 5  | 1380 | 20.2 | 980  | 446  | 19.0 | 576  | 232 | 9.8  | 301 |
| Silver fir     | Germany BW  | Ta 229/1                          | 60  | 1883 | 1904 | 5  | 2420 | 13.3 | 879  | 234  | 8.0  | 294  | 124 | 4.1  | 156 |
| Silver fir     | Germany BW  | Ta 233/1                          | 76  | 1890 | 1941 | 8  | 872  | 25.7 | 912  | 469  | 15.5 | 768  | 242 | 7.8  | 398 |
| Silver fir     | Germany BW  | Ta 239/1                          | 96  | 1887 | 1944 | 9  | 393  | 37.5 | 753  | 598  | 9.7  | 1042 | 305 | 4.8  | 535 |
| Silver fir     | Germany BW  | Ta 242/1                          | 85  | 1898 | 1960 | 12 | 440  | 33.4 | 700  | 502  | 10.9 | 779  | 257 | 5.4  | 401 |
| Silver fir     | Switzerland | 1014000/1                         | 133 | 1905 | 1944 | 8  | 309  | 46.0 | 823  | 671  | 11.6 | 1141 | 339 | 5.7  | 579 |
| Silver fir     | Switzerland | 1030003/1                         | 114 | 1914 | 1964 | 7  | 342  | 43.5 | 831  | 725  | 11.9 | 1154 | 368 | 5.9  | 588 |
| European larch | England     | Bennachie - Kennay/3180           | 80  | 1948 | 2009 | 13 | 704  | 29.5 | 917  | 583  | 9.7  | 772  | 282 | 4.6  | 375 |
| European larch | England     | Bolitho's Plantation/1034         | 75  | 1920 | 1967 | 11 | 618  | 27.3 | 711  | 511  | 18.1 | 778  | 248 | 8.7  | 380 |
| European larch | England     | Kidnalls/1415                     | 44  | 1956 | 1977 | 6  | 503  | 27.4 | 583  | 295  | 14.8 | 486  | 143 | 7.0  | 237 |
| European larch | England     | Kidnalls/1416                     | 78  | 1956 | 2012 | 12 | 1229 | 26.0 | 1311 | 814  | 8.6  | 948  | 396 | 4.1  | 462 |
| European larch | England     | Murthly - Duncans Hill/3045       | 70  | 1921 | 1967 | 11 | 862  | 25.3 | 876  | 475  | 6.6  | 582  | 232 | 3.2  | 284 |

|                      |         |                             |     |      |      |    |     |      |     |     |      |     |     |      |      |
|----------------------|---------|-----------------------------|-----|------|------|----|-----|------|-----|-----|------|-----|-----|------|------|
| European larch       | England | Reddings Lodge/1105         | 65  | 1929 | 1974 | 10 | 649 | 29.4 | 842 | 515 | 5.2  | 643 | 249 | 2.4  | 312  |
| European larch       | England | Reddings Lodge/1108         | 65  | 1929 | 1974 | 10 | 571 | 30.5 | 784 | 526 | 12.2 | 663 | 254 | 5.8  | 321  |
| European larch       | England | Reddings Lodge/1125         | 40  | 1929 | 1949 | 5  | 476 | 26.3 | 518 | 233 | 13.5 | 366 | 113 | 6.5  | 179  |
| European larch       | England | Reddings Lodge/1127         | 39  | 1929 | 1949 | 5  | 476 | 26.5 | 522 | 226 | 11.2 | 344 | 110 | 5.3  | 168  |
| European larch       | England | Seafield - Tom-An-Uird/3067 | 77  | 1924 | 1970 | 10 | 826 | 21.9 | 667 | 314 | 3.8  | 414 | 154 | 1.8  | 203  |
| European larch       | England | Shambellie Wood/3074        | 84  | 1926 | 1994 | 14 | 481 | 35.2 | 833 | 610 | 6.1  | 949 | 293 | 2.8  | 459  |
| European larch       | England | The Oaks/2003               | 61  | 1913 | 1938 | 6  | 582 | 24.3 | 558 | 275 | 7.4  | 407 | 134 | 3.5  | 199  |
| European larch       | England | Wigmore Rolls/1400          | 47  | 1954 | 1982 | 8  | 388 | 29.5 | 505 | 188 | 6.3  | 313 | 91  | 2.9  | 152  |
| European larch       | England | Wigmore Rolls/1401          | 47  | 1954 | 1982 | 8  | 482 | 26.3 | 522 | 188 | 4.9  | 316 | 91  | 2.2  | 154  |
| European larch       | England | Wigmore Rolls/1402          | 47  | 1954 | 1982 | 8  | 586 | 24.6 | 570 | 217 | 8.3  | 344 | 106 | 3.9  | 169  |
| European larch       | Poland  | Rogow/1                     | 51  | 1975 | 2015 | 11 | 463 | 34.1 | 761 | 575 | 21.5 | 770 | 277 | 10.2 | 372  |
| European larch       | Poland  | Rogow/2                     | 51  | 1975 | 2015 | 11 | 460 | 33.2 | 724 | 534 | 14.7 | 717 | 258 | 7.0  | 347  |
| European larch       | Poland  | Rogow/3                     | 51  | 1975 | 2015 | 11 | 514 | 32.2 | 770 | 559 | 16.4 | 745 | 270 | 7.8  | 361  |
| sessile / common Oak | Denmark | AZ/1                        | 112 | 1893 | 1930 | 6  | 190 | 41.4 | 427 | 387 | 5.4  | 586 | 457 | 7.3  | 684  |
| sessile / common Oak | Denmark | BN/1                        | 96  | 1894 | 1930 | 6  | 194 | 38.0 | 381 | 321 | 7.6  | 522 | 373 | 9.5  | 596  |
| sessile / common Oak | Denmark | CS/1                        | 184 | 1903 | 1969 | 16 | 43  | 86.4 | 314 | 548 | 9.3  | 853 | 755 | 13.4 | 1162 |
| sessile / common Oak | Denmark | CT/1                        | 98  | 1903 | 1930 | 6  | 69  | 52.7 | 228 | 247 | 7.9  | 383 | 307 | 10.6 | 471  |
| sessile / common Oak | Denmark | QD/3                        | 121 | 1920 | 2014 | 19 | 267 | 41.4 | 599 | 598 | 9.7  | 938 | 707 | 14.2 | 1071 |
| sessile / common Oak | Denmark | QR/1                        | 201 | 1936 | 2015 | 11 | 79  | 71.2 | 426 | 587 | 6.3  | 819 | 777 | 8.9  | 1061 |
| sessile / common Oak | Denmark | QS/1                        | 180 | 1931 | 2011 | 11 | 46  | 85.4 | 329 | 577 | 2.5  | 803 | 794 | 3.7  | 1090 |
| sessile / common Oak | Denmark | QX/F1                       | 85  | 1945 | 2009 | 17 | 571 | 30.2 | 774 | 596 | 10.8 | 666 | 659 | 13.0 | 733  |
| sessile / common Oak | Denmark | QX/F2                       | 85  | 1945 | 2009 | 16 | 497 | 29.9 | 664 | 528 | 10.8 | 651 | 583 | 13.4 | 716  |
| sessile / common Oak | Denmark | QX/G1                       | 85  | 1945 | 2009 | 17 | 355 | 32.4 | 538 | 450 | 10.7 | 739 | 504 | 13.0 | 803  |
| sessile / common Oak | Denmark | QX/G2                       | 85  | 1945 | 2009 | 17 | 379 | 31.7 | 554 | 449 | 10.5 | 725 | 502 | 12.7 | 785  |
| sessile / common Oak | Denmark | QX/K1                       | 85  | 1945 | 2009 | 17 | 322 | 34.8 | 546 | 434 | 9.4  | 718 | 494 | 11.8 | 790  |
| sessile / common Oak | Denmark | QX/K2                       | 85  | 1945 | 2009 | 17 | 296 | 36.4 | 541 | 456 | 10.0 | 761 | 524 | 12.6 | 843  |
| sessile / common Oak | Denmark | QX/L1                       | 85  | 1945 | 2009 | 16 | 513 | 31.3 | 735 | 570 | 9.5  | 677 | 635 | 11.8 | 750  |
| sessile / common Oak | Denmark | QX/L2                       | 85  | 1945 | 2009 | 17 | 609 | 30.9 | 854 | 664 | 12.7 | 752 | 737 | 15.5 | 832  |
| sessile / common Oak | Denmark | QY/N1                       | 85  | 1947 | 2009 | 15 | 363 | 32.5 | 553 | 429 | 7.5  | 696 | 482 | 9.2  | 759  |

|                      |         |                                 |     |      |      |    |     |      |     |     |      |     |     |      |     |
|----------------------|---------|---------------------------------|-----|------|------|----|-----|------|-----|-----|------|-----|-----|------|-----|
| sessile / common Oak | Denmark | QY/N2                           | 71  | 1947 | 1995 | 14 | 336 | 32.2 | 503 | 394 | 13.0 | 639 | 441 | 15.8 | 695 |
| sessile / common Oak | Denmark | QY/Q1                           | 85  | 1947 | 2009 | 15 | 292 | 35.8 | 521 | 456 | 8.7  | 739 | 523 | 11.0 | 821 |
| sessile / common Oak | Denmark | QY/Q2                           | 85  | 1947 | 2009 | 15 | 302 | 34.9 | 514 | 450 | 8.2  | 749 | 513 | 10.3 | 828 |
| sessile / common Oak | Denmark | QY/T1                           | 85  | 1947 | 2009 | 15 | 473 | 31.3 | 677 | 536 | 9.9  | 731 | 597 | 12.3 | 808 |
| sessile / common Oak | Denmark | QY/T2                           | 90  | 1947 | 2014 | 16 | 312 | 36.9 | 583 | 505 | 10.1 | 773 | 582 | 14.9 | 883 |
| sessile / common Oak | Denmark | QZ/1                            | 119 | 1945 | 2012 | 11 | 62  | 63.4 | 276 | 336 | 2.6  | 547 | 435 | 4.1  | 685 |
| sessile / common Oak | Denmark | QZ/2                            | 85  | 1945 | 1978 | 8  | 88  | 46.9 | 243 | 242 | 6.7  | 391 | 293 | 8.8  | 466 |
| sessile / common Oak | Denmark | QZ/3                            | 78  | 1945 | 1971 | 8  | 90  | 46.5 | 243 | 238 | 7.9  | 364 | 288 | 10.5 | 434 |
| sessile / common Oak | Denmark | QZ/4                            | 119 | 1945 | 2012 | 12 | 57  | 65.9 | 269 | 343 | 3.9  | 554 | 446 | 5.7  | 698 |
| sessile / common Oak | Denmark | QZ/5                            | 121 | 1945 | 2012 | 12 | 63  | 64.3 | 289 | 366 | 4.8  | 568 | 475 | 6.9  | 715 |
| sessile / common Oak | Denmark | QZ/6                            | 87  | 1945 | 1978 | 9  | 79  | 50.0 | 241 | 251 | 6.1  | 410 | 309 | 8.1  | 494 |
| sessile / common Oak | Denmark | QZ/7                            | 94  | 1945 | 1985 | 10 | 63  | 55.6 | 227 | 259 | 6.5  | 437 | 325 | 9.0  | 537 |
| sessile / common Oak | Denmark | QZ/8                            | 94  | 1945 | 1985 | 10 | 62  | 57.4 | 236 | 278 | 7.4  | 476 | 352 | 10.2 | 588 |
| sessile / common Oak | Denmark | QZ/9                            | 94  | 1945 | 1985 | 10 | 67  | 57.8 | 256 | 309 | 6.9  | 509 | 392 | 9.7  | 630 |
| sessile / common Oak | Denmark | RA/1                            | 72  | 1958 | 2016 | 16 | 496 | 25.8 | 522 | 356 | 5.0  | 592 | 381 | 8.6  | 612 |
| sessile / common Oak | Denmark | RA/10                           | 72  | 1958 | 2016 | 16 | 626 | 25.6 | 648 | 427 | 3.7  | 608 | 456 | 4.7  | 635 |
| sessile / common Oak | Denmark | RA/11                           | 52  | 1958 | 1996 | 11 | 645 | 22.4 | 539 | 334 | 17.2 | 532 | 347 | 19.1 | 524 |
| sessile / common Oak | Denmark | RA/12                           | 72  | 1958 | 2016 | 16 | 588 | 26.2 | 635 | 459 | 8.3  | 606 | 492 | 10.4 | 638 |
| sessile / common Oak | Denmark | RA/2                            | 52  | 1958 | 1996 | 11 | 612 | 23.1 | 540 | 318 | 16.1 | 535 | 332 | 18.2 | 534 |
| sessile / common Oak | Denmark | RA/5                            | 58  | 1958 | 2002 | 12 | 515 | 24.4 | 495 | 319 | 8.5  | 543 | 337 | 10.2 | 547 |
| sessile / common Oak | England | Abbotswood/1413                 | 51  | 1956 | 1978 | 5  | 705 | 19.7 | 480 | 195 | 13.7 | 326 | 197 | 15.1 | 322 |
| sessile / common Oak | England | Apethorpe/1249                  | 55  | 1949 | 1974 | 7  | 535 | 21.5 | 421 | 153 | 7.3  | 244 | 158 | 8.1  | 246 |
| sessile / common Oak | England | Batty Daws<br>Wood/1029         | 153 | 1920 | 2010 | 14 | 51  | 66.8 | 247 | 252 | 6.4  | 696 | 330 | 8.9  | 861 |
| sessile / common Oak | England | Didlington/1307                 | 82  | 1952 | 2010 | 12 | 462 | 30.6 | 638 | 378 | 10.6 | 536 | 419 | 12.3 | 582 |
| sessile / common Oak | England | Dymock Wood/1030                | 113 | 1920 | 1974 | 10 | 245 | 38.3 | 486 | 298 | 12.9 | 474 | 346 | 15.7 | 540 |
| sessile / common Oak | England | Fineshade. Town<br>Wood/1344    | 57  | 1953 | 1985 | 7  | 461 | 24.8 | 455 | 191 | 7.3  | 312 | 202 | 8.3  | 324 |
| sessile / common Oak | England | Hazelborough Green<br>Man/1364  | 84  | 1953 | 2013 | 13 | 458 | 29.4 | 595 | 357 | 9.2  | 552 | 393 | 12.2 | 599 |
| sessile / common Oak | England | High Meadow -<br>Knockalls/1095 | 40  | 1927 | 1950 | 5  | 926 | 16.2 | 459 | 137 | 8.8  | 218 | 133 | 9.2  | 209 |
| sessile / common Oak | England | Micheldever/1320                | 86  | 1952 | 2013 | 14 | 479 | 31.0 | 677 | 401 | 2.4  | 573 | 446 | 3.6  | 627 |



|                      |             |                                          |     |      |      |    |     |      |     |     |      |      |      |      |      |
|----------------------|-------------|------------------------------------------|-----|------|------|----|-----|------|-----|-----|------|------|------|------|------|
| sessile / common Oak | England     | Roudham - High Bridgham/1436             | 49  | 1956 | 1982 | 7  | 483 | 22.8 | 415 | 156 | 8.5  | 266  | 163  | 9.7  | 270  |
| sessile / common Oak | England     | Snoring/1300                             | 53  | 1952 | 1988 | 8  | 624 | 23.2 | 553 | 231 | 6.9  | 326  | 242  | 7.7  | 333  |
| sessile / common Oak | England     | Wensum - Swanton Novers/1303             | 48  | 1952 | 1978 | 6  | 577 | 20.7 | 426 | 166 | 8.4  | 289  | 169  | 9.5  | 289  |
| sessile / common Oak | England     | Wyre Forest/1271                         | 104 | 1950 | 1991 | 7  | 159 | 47.4 | 444 | 323 | 6.7  | 458  | 393  | 8.7  | 545  |
| sessile / common Oak | France      | Belleme chatelier/1                      | 177 | 1934 | 2016 | 15 | 130 | 61.6 | 553 | 760 | 8.9  | 1128 | 976  | 12.4 | 1420 |
| sessile / common Oak | France      | Blois Allee-de-Blois/Allee-de-Blois      | 208 | 1927 | 2014 | 17 | 131 | 60.3 | 538 | 751 | 10.5 | 1165 | 960  | 14.3 | 1455 |
| sessile / common Oak | France      | Blois Marchais-Des-Cordeliers/1          | 189 | 1925 | 2014 | 19 | 158 | 54.6 | 553 | 720 | 12.2 | 1157 | 902  | 16.5 | 1410 |
| sessile / common Oak | France      | Blois Pauvert/1                          | 153 | 1926 | 2014 | 18 | 204 | 46.2 | 547 | 617 | 10.5 | 1090 | 746  | 13.9 | 1269 |
| sessile / common Oak | France      | Blois Sablonnieres/2B                    | 125 | 1925 | 2014 | 16 | 377 | 35.6 | 664 | 652 | 14.5 | 959  | 746  | 17.9 | 1067 |
| sessile / common Oak | France      | Blois Sablonnieres/3                     | 125 | 1925 | 2014 | 15 | 278 | 39.2 | 573 | 569 | 10.7 | 981  | 665  | 13.6 | 1086 |
| sessile / common Oak | France      | Champenoux Butte-de-Tir/2                | 130 | 1928 | 2015 | 19 | 284 | 38.8 | 574 | 545 | 11.3 | 1039 | 635  | 14.1 | 1150 |
| sessile / common Oak | France      | Champenoux Grande Bouzule/2              | 147 | 1928 | 2015 | 21 | 206 | 46.5 | 557 | 611 | 9.2  | 1014 | 739  | 12.2 | 1199 |
| sessile / common Oak | France      | Reno-Valdieu Reno/C12                    | 99  | 1956 | 2015 | 16 | 305 | 38.7 | 614 | 613 | 12.9 | 844  | 714  | 16.1 | 953  |
| sessile / common Oak | France      | Reno-Valdieu Reno/C14                    | 99  | 1956 | 2015 | 16 | 330 | 36.1 | 595 | 577 | 14.1 | 784  | 662  | 17.4 | 871  |
| sessile / common Oak | France      | Reno-Valdieu Reno/C3                     | 99  | 1956 | 2015 | 16 | 420 | 32.5 | 641 | 550 | 15.2 | 924  | 617  | 18.3 | 990  |
| sessile / common Oak | France      | Reno-Valdieu Reno/C5                     | 99  | 1956 | 2015 | 15 | 435 | 31.1 | 619 | 486 | 13.0 | 799  | 541  | 15.4 | 846  |
| sessile / common Oak | France      | Troncais Cles-des-Fosses/Cles-des-Fosses | 195 | 1931 | 2016 | 15 | 88  | 72.8 | 489 | 761 | 9.1  | 1468 | 1013 | 13.1 | 1877 |
| sessile / common Oak | France      | Troncais Richebourg/Richebourg           | 202 | 1931 | 2003 | 11 | 81  | 73.7 | 457 | 703 | 7.7  | 1119 | 938  | 11.4 | 1469 |
| sessile / common Oak | France      | Troncais Tresor/1                        | 137 | 1932 | 2016 | 15 | 263 | 43.3 | 634 | 732 | 12.6 | 1147 | 873  | 16.2 | 1322 |
| sessile / common Oak | Germany GOE | ID 012103/2                              | 168 | 1931 | 2005 | 15 | 192 | 62.8 | 842 | 686 | 12.8 | 1108 | 885  | 17.6 | 1413 |
| sessile / common Oak | Germany GOE | ID 033122/2                              | 162 | 1930 | 1992 | 12 | 160 | 48.9 | 470 | 541 | 7.3  | 915  | 662  | 10.1 | 1099 |
| sessile / common Oak | Germany GOE | ID 052122/2                              | 214 | 1929 | 2009 | 16 | 282 | 53.4 | 953 | 492 | 8.6  | 833  | 613  | 11.2 | 1029 |
| sessile / common Oak | Germany GOE | ID 640110/1                              | 60  | 1983 | 2010 | 7  | 529 | 26.7 | 588 | 360 | 10.6 | 473  | 388  | 12.9 | 504  |
| sessile / common Oak | Germany GOE | ID 642120/1                              | 61  | 1983 | 2010 | 7  | 788 | 24.9 | 783 | 497 | 16.2 | 614  | 528  | 18.7 | 645  |
| sessile / common Oak | Germany GOE | ID 643110/2                              | 63  | 1983 | 2010 | 7  | 558 | 25.8 | 587 | 341 | 10.8 | 427  | 365  | 12.9 | 454  |
| sessile / common Oak | Germany GOE | ID 644110/3                              | 63  | 1983 | 2011 | 7  | 540 | 26.0 | 575 | 358 | 9.5  | 481  | 384  | 11.2 | 509  |
| sessile / common Oak | Germany GOE | ID 645110/1                              | 65  | 1983 | 2010 | 7  | 562 | 24.4 | 541 | 299 | 12.4 | 416  | 316  | 13.9 | 432  |

|                      |             |              |     |      |      |    |      |      |     |     |      |      |     |      |      |
|----------------------|-------------|--------------|-----|------|------|----|------|------|-----|-----|------|------|-----|------|------|
| sessile / common Oak | Germany GOE | ID 646110/1  | 66  | 1983 | 2010 | 7  | 521  | 28.5 | 643 | 415 | 11.8 | 494  | 453 | 14.2 | 537  |
| sessile / common Oak | Germany GOE | ID 778110/3  | 185 | 1929 | 2013 | 15 | 102  | 67.6 | 503 | 660 | 9.4  | 969  | 865 | 13.1 | 1257 |
| sessile / common Oak | Germany GOE | ID 858120/1  | 44  | 1988 | 2012 | 6  | 1143 | 15.8 | 547 | 184 | 7.0  | 236  | 178 | 8.1  | 227  |
| sessile / common Oak | Germany GOE | ID 858120/10 | 44  | 1988 | 2012 | 6  | 776  | 19.5 | 521 | 219 | 8.4  | 305  | 221 | 10.6 | 306  |
| sessile / common Oak | Germany GOE | ID 905110/6  | 43  | 1991 | 2011 | 6  | 894  | 19.4 | 595 | 258 | 12.0 | 333  | 260 | 13.9 | 333  |
| sessile / common Oak | Germany GOE | ID H34120/2  | 61  | 1976 | 2010 | 9  | 1087 | 20.0 | 760 | 386 | 12.0 | 458  | 391 | 13.5 | 462  |
| sessile / common Oak | Germany GOE | ID H34120/4  | 61  | 1976 | 2010 | 9  | 1057 | 21.4 | 824 | 458 | 15.8 | 573  | 471 | 18.1 | 584  |
| sessile / common Oak | Germany GOE | ID H36110/3  | 42  | 1989 | 2013 | 6  | 922  | 20.3 | 660 | 345 | 15.2 | 443  | 351 | 16.8 | 447  |
| sessile / common Oak | Germany GOE | ID H36110/5  | 42  | 1989 | 2013 | 6  | 875  | 20.5 | 636 | 336 | 14.7 | 426  | 343 | 16.2 | 431  |
| sessile / common Oak | Germany MUE | 311/1        | 113 | 1959 | 2014 | 9  | 342  | 37.3 | 650 | 535 | 12.5 | 827  | 619 | 15.5 | 928  |
| sessile / common Oak | Germany MUE | 39/1         | 84  | 1885 | 1926 | 8  | 259  | 31.5 | 375 | 274 | 7.2  | 482  | 306 | 9.0  | 526  |
| sessile / common Oak | Germany MUE | 59/1         | 159 | 1901 | 1993 | 12 | 200  | 46.1 | 534 | 580 | 7.9  | 1095 | 701 | 10.4 | 1258 |
| sessile / common Oak | Germany MUE | 60/1         | 89  | 1900 | 1947 | 7  | 420  | 25.3 | 428 | 239 | 6.4  | 425  | 255 | 7.3  | 438  |
| sessile / common Oak | Germany MUE | 62/1         | 89  | 1900 | 1951 | 7  | 359  | 29.9 | 478 | 372 | 9.7  | 641  | 411 | 11.5 | 689  |
| sessile / common Oak | Germany MUE | 63/1         | 114 | 1900 | 1976 | 11 | 378  | 31.0 | 534 | 415 | 10.5 | 663  | 461 | 13.2 | 715  |
| sessile / common Oak | Germany MUE | 88/2         | 96  | 1934 | 1982 | 8  | 548  | 28.9 | 692 | 550 | 9.6  | 734  | 603 | 12.3 | 794  |
| sessile / common Oak | Germany MUE | 88/5         | 126 | 1934 | 2012 | 13 | 381  | 38.3 | 756 | 764 | 13.3 | 1101 | 888 | 17.2 | 1249 |
| sessile / common Oak | Germany MUE | 90/1         | 149 | 1934 | 2013 | 10 | 384  | 37.1 | 724 | 651 | 12.9 | 985  | 752 | 16.3 | 1107 |
| sessile / common Oak | Poland      | SCH_G/40     | 132 | 1900 | 1986 | 11 | 186  | 45.9 | 493 | 443 | 6.0  | 752  | 535 | 7.8  | 862  |
| sessile / common Oak | Poland      | SCH_G/41     | 147 | 1928 | 2001 | 10 | 181  | 47.5 | 506 | 502 | 9.0  | 833  | 611 | 12.0 | 997  |
| sessile / common Oak | Poland      | SCH_J/42     | 147 | 1900 | 1996 | 16 | 151  | 53.0 | 505 | 562 | 6.1  | 1031 | 700 | 8.0  | 1208 |
| sessile / common Oak | Poland      | SCH_J/43     | 167 | 1928 | 2016 | 16 | 169  | 51.6 | 541 | 604 | 7.7  | 1038 | 748 | 10.4 | 1261 |
| sessile / common Oak | Poland      | SCH_K/44     | 146 | 1928 | 2016 | 16 | 140  | 43.4 | 339 | 610 | 1.9  | 1045 | 728 | 3.2  | 1218 |
| sessile / common Oak | Poland      | SCH_K/45     | 146 | 1928 | 2016 | 16 | 250  | 43.4 | 606 | 610 | 9.5  | 1038 | 728 | 12.2 | 1218 |
| sessile / common Oak | Poland      | SCH_L/47     | 221 | 1900 | 2016 | 20 | 55   | 81.0 | 363 | 484 | 6.0  | 894  | 659 | 9.0  | 1177 |
| sessile / common Oak | Poland      | SCH_L/48     | 217 | 1929 | 2011 | 15 | 47   | 78.2 | 293 | 391 | 4.9  | 748  | 528 | 7.4  | 991  |
| sessile / common Oak | Poland      | SCH_M/49     | 141 | 1912 | 2016 | 18 | 130  | 51.6 | 416 | 386 | 7.5  | 701  | 478 | 10.5 | 836  |
| sessile / common Oak | Poland      | SCH_N/54     | 105 | 1907 | 1977 | 11 | 280  | 39.4 | 581 | 487 | 7.9  | 879  | 570 | 11.4 | 979  |
| sessile / common Oak | Poland      | SCH_N/55     | 71  | 1907 | 1943 | 7  | 840  | 20.1 | 592 | 302 | 9.5  | 541  | 307 | 10.4 | 539  |

|                      |         |                                 |     |      |      |    |      |      |      |     |      |      |     |      |     |
|----------------------|---------|---------------------------------|-----|------|------|----|------|------|------|-----|------|------|-----|------|-----|
| sessile / common Oak | Poland  | SCH_N/56                        | 125 | 1931 | 1997 | 11 | 240  | 41.2 | 535  | 478 | 7.4  | 843  | 564 | 9.9  | 984 |
| sessile / common Oak | Poland  | SCH_N/57                        | 120 | 1931 | 1992 | 10 | 184  | 44.9 | 471  | 432 | 7.7  | 715  | 519 | 10.3 | 845 |
| Scots pine           | Austria | 308/40                          | 55  | 1975 | 2014 | 10 | 1200 | 22.8 | 1035 | 577 | 20.8 | 943  | 283 | 10.0 | 464 |
| Scots pine           | Austria | 308/50                          | 55  | 1975 | 2014 | 10 | 1180 | 22.9 | 1025 | 581 | 20.1 | 920  | 284 | 9.7  | 452 |
| Scots pine           | England | Achnashellach/3254              | 59  | 1951 | 1982 | 9  | 410  | 35.5 | 719  | 349 | 13.6 | 592  | 168 | 6.5  | 286 |
| Scots pine           | England | Balmoral - Garmaddie Woods/3029 | 123 | 1920 | 2008 | 16 | 771  | 34.2 | 1272 | 779 | 25.4 | 1018 | 375 | 12.1 | 491 |
| Scots pine           | England | Black Isle - Findon/3245        | 54  | 1951 | 1983 | 9  | 693  | 24.1 | 653  | 276 | 15.5 | 458  | 135 | 7.5  | 224 |
| Scots pine           | England | Black Isle - Findon/3246        | 54  | 1951 | 1983 | 9  | 610  | 25.7 | 637  | 266 | 14.4 | 454  | 130 | 6.9  | 222 |
| Scots pine           | England | Black Isle - Findon/3247        | 50  | 1951 | 1979 | 8  | 699  | 23.6 | 638  | 250 | 9.4  | 426  | 122 | 4.5  | 209 |
| Scots pine           | England | Black Isle - Findon/3248        | 60  | 1951 | 1989 | 9  | 563  | 27.4 | 651  | 283 | 10.2 | 486  | 138 | 4.8  | 237 |
| Scots pine           | England | Black Isle - Findon/3249        | 45  | 1951 | 1974 | 6  | 707  | 23.8 | 653  | 253 | 13.9 | 418  | 123 | 6.7  | 205 |
| Scots pine           | England | Black Isle - Findon/3410        | 76  | 1963 | 2011 | 9  | 1168 | 23.4 | 1052 | 490 | 12.4 | 699  | 240 | 5.9  | 342 |
| Scots pine           | England | Black Isle - Findon/3411        | 76  | 1963 | 2011 | 9  | 1426 | 23.7 | 1312 | 563 | 11.9 | 643  | 275 | 5.7  | 315 |
| Scots pine           | England | Black Isle - Findon/3412        | 76  | 1963 | 2011 | 9  | 1191 | 26.6 | 1313 | 582 | 12.0 | 655  | 283 | 5.7  | 319 |
| Scots pine           | England | Black Isle - Findon/3413        | 76  | 1963 | 2011 | 9  | 843  | 31.7 | 1234 | 640 | 11.9 | 716  | 309 | 5.6  | 346 |
| Scots pine           | England | Brick Kiln/1104                 | 137 | 1928 | 2002 | 16 | 334  | 51.8 | 1075 | 873 | 5.2  | 1303 | 413 | 2.4  | 618 |
| Scots pine           | England | Cannock Chase/1330              | 61  | 1952 | 1985 | 7  | 354  | 32.2 | 531  | 278 | 10.7 | 469  | 134 | 5.1  | 228 |
| Scots pine           | England | Cannock Chase/1332              | 78  | 1952 | 2003 | 10 | 544  | 32.9 | 844  | 526 | 12.2 | 680  | 254 | 5.7  | 329 |
| Scots pine           | England | Crowthorne/1435                 | 50  | 1956 | 1976 | 5  | 803  | 19.7 | 549  | 185 | 11.0 | 301  | 91  | 5.3  | 149 |
| Scots pine           | England | Culbin/3138                     | 60  | 1946 | 1982 | 11 | 610  | 25.4 | 624  | 243 | 6.9  | 403  | 118 | 3.3  | 197 |
| Scots pine           | England | Culbin/3139                     | 88  | 1946 | 2009 | 15 | 980  | 26.0 | 1041 | 494 | 11.1 | 651  | 240 | 5.3  | 318 |
| Scots pine           | England | Cwmcam/2093                     | 38  | 1952 | 1972 | 6  | 610  | 21.9 | 494  | 149 | 14.2 | 228  | 73  | 6.9  | 112 |
| Scots pine           | England | Cwmcam/2094                     | 51  | 1952 | 1986 | 8  | 531  | 29.1 | 679  | 267 | 8.1  | 381  | 129 | 3.9  | 185 |
| Scots pine           | England | Cwmcam/2095                     | 51  | 1952 | 1986 | 8  | 610  | 27.5 | 710  | 291 | 9.8  | 419  | 141 | 4.7  | 204 |
| Scots pine           | England | Cwmcam/2096                     | 32  | 1952 | 1966 | 5  | 1102 | 17.2 | 607  | 136 | 9.6  | 208  | 67  | 4.6  | 103 |
| Scots pine           | England | Deer Park, Fochabers/3229       | 88  | 1950 | 2008 | 11 | 1205 | 27.6 | 1408 | 697 | 11.5 | 882  | 338 | 5.5  | 429 |
| Scots pine           | England | Deer Park, Fochabers/3230       | 62  | 1950 | 1982 | 8  | 768  | 25.9 | 813  | 359 | 10.3 | 606  | 175 | 4.9  | 297 |

|            |             |                                  |     |      |      |    |      |      |      |     |      |      |     |      |     |
|------------|-------------|----------------------------------|-----|------|------|----|------|------|------|-----|------|------|-----|------|-----|
| Scots pine | England     | Dilston - Dipton Wood/1076       | 131 | 1922 | 2001 | 14 | 266  | 48.6 | 772  | 575 | 21.3 | 940  | 273 | 9.9  | 448 |
| Scots pine | England     | Dilston - Dipton Wood/1077       | 131 | 1922 | 2001 | 14 | 658  | 37.7 | 1272 | 855 | 22.2 | 1059 | 410 | 10.6 | 509 |
| Scots pine | England     | Elveden-Brandon Park/1131        | 92  | 1938 | 1997 | 14 | 815  | 27.8 | 966  | 480 | 8.6  | 661  | 233 | 4.1  | 322 |
| Scots pine | England     | Glenbervie Inclosure/1429        | 37  | 1954 | 1973 | 6  | 1031 | 19.1 | 667  | 250 | 20.0 | 434  | 123 | 9.7  | 215 |
| Scots pine | England     | Glendye - Gallybank/3015         | 96  | 1920 | 1980 | 13 | 1051 | 27.0 | 1188 | 599 | 8.5  | 808  | 291 | 4.1  | 394 |
| Scots pine | England     | Glendye - Gallybank/3016         | 65  | 1920 | 1950 | 7  | 757  | 25.6 | 785  | 309 | 4.1  | 518  | 151 | 1.9  | 253 |
| Scots pine | England     | Laigh of Moray - Roseisle/3344   | 31  | 1949 | 1966 | 6  | 1348 | 17.3 | 745  | 209 | 17.3 | 343  | 103 | 8.4  | 170 |
| Scots pine | England     | Laigh of Moray - Roseisle/3345   | 37  | 1949 | 1971 | 7  | 608  | 25.8 | 640  | 221 | 15.5 | 344  | 108 | 7.4  | 168 |
| Scots pine | England     | Laigh of Moray - Roseisle/3347   | 37  | 1949 | 1971 | 7  | 814  | 22.8 | 702  | 238 | 18.1 | 389  | 116 | 8.8  | 191 |
| Scots pine | England     | Novar - Evanton Wood/3033        | 78  | 1921 | 1971 | 13 | 941  | 30.0 | 1260 | 768 | 18.2 | 1049 | 372 | 8.7  | 510 |
| Scots pine | England     | Rendlesham/1153                  | 38  | 1941 | 1959 | 8  | 652  | 21.9 | 526  | 180 | 11.3 | 298  | 88  | 5.4  | 147 |
| Scots pine | England     | Seafield - Achvochie/3064        | 89  | 1924 | 1970 | 10 | 1542 | 22.8 | 1334 | 497 | 5.4  | 659  | 243 | 2.6  | 323 |
| Scots pine | England     | Seafield Estate - Curr Wood/3069 | 102 | 1925 | 1982 | 12 | 1203 | 27.5 | 1399 | 672 | 11.9 | 871  | 327 | 5.7  | 424 |
| Scots pine | England     | South Oakley Inclosure/1313      | 88  | 1952 | 2013 | 14 | 794  | 31.9 | 1175 | 690 | 3.3  | 874  | 333 | 1.5  | 423 |
| Scots pine | England     | South Oakley/1312                | 77  | 1952 | 2003 | 12 | 365  | 40.4 | 788  | 507 | 32.8 | 810  | 242 | 15.6 | 390 |
| Scots pine | England     | Swaffham/1133                    | 91  | 1938 | 2012 | 17 | 758  | 31.2 | 1079 | 630 | 5.5  | 895  | 304 | 2.6  | 434 |
| Scots pine | England     | Swaffham/1134                    | 40  | 1938 | 1961 | 9  | 675  | 22.2 | 559  | 196 | 12.8 | 344  | 96  | 6.2  | 169 |
| Scots pine | Germany BW  | Kie 120/3                        | 54  | 1981 | 2012 | 7  | 1037 | 19.2 | 679  | 237 | 8.2  | 383  | 117 | 4.0  | 189 |
| Scots pine | Germany BW  | Kie 156/2                        | 83  | 1956 | 2015 | 17 | 575  | 31.0 | 812  | 564 | 7.5  | 915  | 273 | 3.5  | 444 |
| Scots pine | Germany BW  | Kie 157/2                        | 81  | 1956 | 2015 | 17 | 593  | 31.1 | 842  | 587 | 7.1  | 887  | 284 | 3.4  | 430 |
| Scots pine | Germany BW  | Kie 158/2                        | 81  | 1956 | 2015 | 17 | 600  | 31.9 | 887  | 648 | 8.5  | 1000 | 313 | 4.0  | 484 |
| Scots pine | Germany GOE | ID 462711/2                      | 57  | 1973 | 2001 | 6  | 915  | 22.7 | 784  | 331 | 10.7 | 499  | 162 | 5.1  | 245 |
| Scots pine | Germany GOE | ID 911711/6                      | 39  | 1991 | 2014 | 6  | 2084 | 16.9 | 1112 | 400 | 20.0 | 460  | 198 | 9.7  | 228 |
| Scots pine | Germany GOE | ID 911711/8                      | 39  | 1991 | 2014 | 6  | 2251 | 15.7 | 1067 | 344 | 17.0 | 384  | 171 | 8.3  | 191 |
| Scots pine | Germany GOE | ID 912711/7                      | 38  | 1991 | 2014 | 6  | 2136 | 15.4 | 981  | 318 | 13.0 | 359  | 158 | 6.3  | 179 |
| Scots pine | Germany GOE | ID 913711/7                      | 39  | 1991 | 2014 | 6  | 1924 | 16.3 | 968  | 316 | 17.2 | 356  | 157 | 8.4  | 177 |
| Scots pine | Germany GOE | ID H09711/1                      | 100 | 1934 | 1993 | 9  | 508  | 31.0 | 717  | 450 | 7.7  | 761  | 218 | 3.7  | 369 |

|            |             |             |     |      |      |    |      |      |      |     |      |      |     |     |     |
|------------|-------------|-------------|-----|------|------|----|------|------|------|-----|------|------|-----|-----|-----|
| Scots pine | Germany GOE | ID H09711/3 | 94  | 1941 | 1997 | 9  | 704  | 26.2 | 759  | 357 | 8.0  | 591  | 174 | 3.7 | 289 |
| Scots pine | Germany GOE | ID H13711/1 | 121 | 1890 | 1986 | 16 | 402  | 36.2 | 728  | 524 | 5.4  | 877  | 252 | 2.5 | 423 |
| Scots pine | Germany GOE | ID H13711/2 | 141 | 1890 | 2006 | 19 | 352  | 40.3 | 757  | 607 | 10.7 | 977  | 290 | 5.0 | 470 |
| Scots pine | Germany GOE | ID H14711/1 | 132 | 1892 | 1986 | 16 | 460  | 36.2 | 833  | 614 | 1.8  | 981  | 295 | 0.8 | 474 |
| Scots pine | Germany GOE | ID H14711/2 | 100 | 1892 | 1954 | 12 | 516  | 32.3 | 778  | 456 | 7.1  | 765  | 220 | 3.4 | 371 |
| Scots pine | Germany GOE | ID H15711/2 | 155 | 1926 | 2006 | 11 | 340  | 39.0 | 694  | 484 | 3.9  | 810  | 232 | 1.8 | 389 |
| Scots pine | Germany GOE | ID S04711/3 | 62  | 1963 | 2011 | 11 | 897  | 25.0 | 897  | 483 | 13.4 | 659  | 235 | 6.4 | 322 |
| Scots pine | Germany MUE | 209/12      | 124 | 1952 | 2013 | 10 | 348  | 34.5 | 584  | 393 | 7.5  | 538  | 189 | 3.5 | 260 |
| Scots pine | Germany MUE | 209/13      | 124 | 1952 | 2013 | 10 | 565  | 27.6 | 662  | 389 | 6.9  | 495  | 189 | 3.3 | 241 |
| Scots pine | Germany MUE | 225/6       | 93  | 1959 | 2012 | 10 | 809  | 32.1 | 1208 | 574 | 12.8 | 923  | 277 | 6.1 | 448 |
| Scots pine | Germany MUE | 226/4       | 79  | 1959 | 1996 | 8  | 510  | 27.4 | 591  | 334 | 11.8 | 598  | 162 | 5.6 | 293 |
| Scots pine | Germany MUE | 228/1       | 106 | 1959 | 2013 | 10 | 453  | 28.7 | 565  | 333 | 9.8  | 567  | 161 | 4.7 | 277 |
| Scots pine | Germany MUE | 229/12      | 81  | 1961 | 2006 | 9  | 550  | 26.6 | 608  | 340 | 8.4  | 559  | 165 | 4.0 | 273 |
| Scots pine | Germany MUE | 230/4       | 92  | 1962 | 2009 | 10 | 520  | 28.3 | 634  | 349 | 6.6  | 524  | 169 | 3.1 | 256 |
| Scots pine | Germany MUE | 234/11      | 129 | 1962 | 2006 | 10 | 367  | 27.8 | 435  | 230 | 6.7  | 492  | 112 | 3.2 | 241 |
| Scots pine | Germany MUE | 238/5       | 98  | 1967 | 2005 | 8  | 583  | 24.6 | 568  | 281 | 8.5  | 525  | 137 | 4.1 | 257 |
| Scots pine | Germany MUE | 52/2        | 131 | 1899 | 1995 | 13 | 383  | 43.3 | 925  | 633 | 9.3  | 1314 | 302 | 4.4 | 632 |
| Scots pine | Germany MUE | 53/2        | 154 | 1899 | 2014 | 15 | 294  | 41.1 | 653  | 604 | 9.8  | 1084 | 289 | 4.6 | 523 |
| Scots pine | Germany MUE | 57/1        | 113 | 1901 | 1970 | 11 | 672  | 23.2 | 596  | 257 | 6.0  | 406  | 126 | 2.9 | 199 |
| Scots pine | Germany MUE | 58/2        | 148 | 1901 | 2014 | 15 | 300  | 34.7 | 508  | 331 | 5.2  | 733  | 159 | 2.5 | 356 |
| Scots pine | Germany MUE | 610/14      | 62  | 1976 | 2014 | 7  | 1361 | 21.1 | 1037 | 483 | 14.7 | 574  | 237 | 7.1 | 282 |
| Scots pine | Germany MUE | 610/2       | 62  | 1976 | 2014 | 7  | 1157 | 20.1 | 815  | 338 | 8.7  | 430  | 166 | 4.2 | 212 |
| Scots pine | Germany MUE | 79/2        | 122 | 1912 | 2008 | 12 | 452  | 35.1 | 779  | 565 | 8.8  | 876  | 272 | 4.2 | 424 |
| Scots pine | Poland      | Lipce/1     | 50  | 1975 | 2014 | 11 | 1157 | 21.0 | 874  | 412 | 17.3 | 505  | 202 | 8.4 | 249 |
| Scots pine | Poland      | Lipce/2     | 50  | 1975 | 2014 | 11 | 1161 | 20.2 | 827  | 380 | 15.1 | 472  | 187 | 7.4 | 233 |
| Scots pine | Poland      | Lipce/3     | 50  | 1975 | 2014 | 11 | 1031 | 22.2 | 853  | 419 | 18.8 | 521  | 205 | 9.1 | 256 |
| Scots pine | Poland      | Lipce/4     | 50  | 1975 | 2014 | 11 | 1086 | 21.6 | 856  | 411 | 18.0 | 508  | 202 | 8.8 | 250 |
| Scots pine | Poland      | Lipce/5     | 50  | 1975 | 2014 | 11 | 973  | 22.3 | 808  | 398 | 18.5 | 525  | 195 | 9.0 | 258 |
| Scots pine | Poland      | SCH_A/1     | 102 | 1911 | 1978 | 10 | 408  | 33.8 | 662  | 452 | 4.2  | 731  | 218 | 2.0 | 354 |

|            |        |          |     |      |      |    |      |      |      |     |      |      |     |     |     |
|------------|--------|----------|-----|------|------|----|------|------|------|-----|------|------|-----|-----|-----|
| Scots pine | Poland | SCH_A/2  | 66  | 1911 | 1942 | 5  | 635  | 25.0 | 635  | 313 | 7.8  | 452  | 153 | 3.7 | 221 |
| Scots pine | Poland | SCH_A/3  | 66  | 1911 | 1942 | 5  | 473  | 26.8 | 529  | 266 | 7.2  | 422  | 129 | 3.4 | 206 |
| Scots pine | Poland | SCH_A/4  | 66  | 1911 | 1942 | 5  | 750  | 23.2 | 665  | 322 | 8.3  | 449  | 157 | 4.0 | 220 |
| Scots pine | Poland | SCH_A/5  | 66  | 1911 | 1942 | 5  | 438  | 26.9 | 493  | 260 | 7.3  | 430  | 126 | 3.5 | 210 |
| Scots pine | Poland | SCH_A/6  | 92  | 1911 | 1968 | 8  | 333  | 34.9 | 569  | 374 | 8.4  | 594  | 180 | 4.0 | 287 |
| Scots pine | Poland | SCH_A/8  | 129 | 1928 | 2013 | 16 | 130  | 49.7 | 393  | 622 | 10.8 | 968  | 295 | 5.0 | 461 |
| Scots pine | Poland | SCH_B/14 | 137 | 1928 | 2013 | 16 | 268  | 46.1 | 716  | 688 | 8.2  | 1059 | 327 | 3.8 | 505 |
| Scots pine | Poland | SCH_B/15 | 137 | 1911 | 2013 | 17 | 188  | 51.9 | 607  | 598 | 8.2  | 1019 | 283 | 3.8 | 485 |
| Scots pine | Poland | SCH_B/16 | 107 | 1911 | 1983 | 11 | 204  | 44.8 | 520  | 449 | 3.4  | 742  | 214 | 1.6 | 355 |
| Scots pine | Poland | SCH_B/17 | 107 | 1928 | 1983 | 10 | 283  | 37.4 | 541  | 446 | 4.6  | 761  | 214 | 2.2 | 366 |
| Scots pine | Poland | SCH_B/18 | 102 | 1911 | 1978 | 10 | 204  | 40.9 | 450  | 353 | 3.4  | 577  | 169 | 1.6 | 277 |
| Scots pine | Poland | SCH_B/19 | 102 | 1911 | 1978 | 10 | 204  | 40.9 | 450  | 353 | 2.6  | 565  | 169 | 1.2 | 272 |
| Scots pine | Poland | SCH_C/23 | 137 | 1932 | 2013 | 15 | 277  | 41.8 | 633  | 564 | 6.4  | 927  | 269 | 3.0 | 445 |
| Scots pine | Poland | SCH_D/27 | 137 | 1928 | 2015 | 16 | 238  | 47.8 | 674  | 634 | 9.0  | 995  | 301 | 4.2 | 475 |
| Scots pine | Poland | SCH_D/28 | 137 | 1928 | 2015 | 16 | 316  | 43.8 | 778  | 724 | 9.0  | 1144 | 345 | 4.2 | 548 |
| Scots pine | Spain  | AV-1/1   | 135 | 1963 | 2015 | 8  | 340  | 48.2 | 975  | 827 | 7.9  | 1239 | 393 | 3.7 | 589 |
| Scots pine | Spain  | BU-1/1   | 139 | 1963 | 2015 | 8  | 719  | 30.7 | 1000 | 524 | 3.7  | 647  | 253 | 1.8 | 313 |
| Scots pine | Spain  | BU-3/1   | 110 | 1963 | 2015 | 8  | 640  | 35.1 | 1103 | 704 | 6.1  | 886  | 339 | 2.9 | 427 |
| Scots pine | Spain  | BU-7/1   | 138 | 1963 | 2015 | 8  | 940  | 28.8 | 1180 | 582 | 1.7  | 784  | 282 | 0.8 | 380 |
| Scots pine | Spain  | COV/1A   | 95  | 1968 | 2013 | 9  | 1142 | 22.2 | 944  | 333 | 4.5  | 394  | 163 | 2.2 | 193 |
| Scots pine | Spain  | COV/1C   | 95  | 1968 | 2013 | 9  | 943  | 23.4 | 848  | 294 | 3.8  | 389  | 144 | 1.9 | 191 |
| Scots pine | Spain  | COV/2A   | 95  | 1968 | 2013 | 9  | 1413 | 21.4 | 1101 | 404 | 6.2  | 495  | 198 | 3.0 | 243 |
| Scots pine | Spain  | COV/2C   | 95  | 1968 | 2013 | 9  | 840  | 25.8 | 884  | 344 | 5.1  | 462  | 167 | 2.5 | 225 |
| Scots pine | Spain  | COV/3A   | 95  | 1968 | 2013 | 9  | 1152 | 24.1 | 1086 | 397 | 5.2  | 468  | 194 | 2.5 | 229 |
| Scots pine | Spain  | DUR/1A   | 86  | 1968 | 2013 | 9  | 1217 | 23.5 | 1102 | 414 | 7.4  | 539  | 202 | 3.5 | 264 |
| Scots pine | Spain  | DUR/2A   | 86  | 1968 | 2013 | 9  | 1267 | 23.6 | 1155 | 434 | 4.5  | 560  | 212 | 2.1 | 274 |
| Scots pine | Spain  | DUR/2C   | 86  | 1968 | 2013 | 9  | 883  | 26.9 | 993  | 380 | 5.8  | 522  | 185 | 2.8 | 254 |
| Scots pine | Spain  | DUR/3A   | 86  | 1968 | 2013 | 9  | 1567 | 21.4 | 1221 | 391 | 4.7  | 445  | 192 | 2.2 | 218 |
| Scots pine | Spain  | DUR/3C   | 86  | 1968 | 2013 | 9  | 821  | 27.1 | 934  | 366 | 4.9  | 515  | 178 | 2.3 | 251 |

|            |        |          |     |      |      |   |      |      |      |     |      |      |     |     |     |
|------------|--------|----------|-----|------|------|---|------|------|------|-----|------|------|-----|-----|-----|
| Scots pine | Spain  | GU-5/1   | 129 | 1964 | 2015 | 7 | 496  | 35.2 | 859  | 506 | 3.4  | 596  | 243 | 1.6 | 287 |
| Scots pine | Spain  | GU-6/1   | 108 | 1964 | 2015 | 7 | 1547 | 22.4 | 1297 | 451 | 3.6  | 483  | 221 | 1.7 | 237 |
| Scots pine | Spain  | GU-8/1   | 86  | 1964 | 2014 | 7 | 1552 | 22.0 | 1264 | 599 | 6.4  | 802  | 293 | 3.0 | 394 |
| Scots pine | Spain  | GU-9/1   | 110 | 1964 | 2015 | 7 | 823  | 27.7 | 970  | 509 | 4.1  | 682  | 247 | 2.0 | 331 |
| Scots pine | Spain  | M-1/1    | 93  | 1963 | 2015 | 8 | 487  | 44.1 | 1211 | 857 | 10.4 | 1046 | 408 | 4.9 | 500 |
| Scots pine | Spain  | M-2/1    | 94  | 1963 | 2015 | 8 | 780  | 35.9 | 1394 | 904 | 13.0 | 1163 | 434 | 6.1 | 560 |
| Scots pine | Spain  | M-3/1    | 100 | 1963 | 2015 | 8 | 390  | 39.7 | 819  | 507 | 4.5  | 551  | 243 | 2.1 | 264 |
| Scots pine | Spain  | M-4/1    | 99  | 1963 | 2015 | 8 | 545  | 31.7 | 798  | 384 | 2.9  | 408  | 185 | 1.4 | 197 |
| Scots pine | Spain  | NEILA/1A | 81  | 1972 | 2012 | 8 | 1114 | 27.6 | 1306 | 713 | 16.5 | 920  | 346 | 7.9 | 448 |
| Scots pine | Spain  | NEILA/2A | 81  | 1972 | 2012 | 8 | 1580 | 25.1 | 1590 | 807 | 16.9 | 961  | 393 | 8.1 | 469 |
| Scots pine | Spain  | NEILA/3A | 81  | 1972 | 2012 | 8 | 1230 | 26.5 | 1351 | 768 | 16.9 | 967  | 373 | 8.1 | 471 |
| Scots pine | Spain  | ROBLE/1A | 52  | 1982 | 2012 | 7 | 1550 | 23.9 | 1442 | 519 | 15.6 | 528  | 253 | 7.5 | 258 |
| Scots pine | Spain  | ROBLE/2A | 52  | 1982 | 2012 | 7 | 1370 | 25.2 | 1388 | 525 | 15.3 | 554  | 256 | 7.4 | 270 |
| Scots pine | Spain  | ROBLE/3A | 52  | 1982 | 2012 | 7 | 1300 | 24.9 | 1292 | 505 | 13.6 | 522  | 246 | 6.6 | 254 |
| Scots pine | Spain  | SO-1/1   | 143 | 1963 | 2015 | 8 | 596  | 35.1 | 1027 | 676 | 3.7  | 822  | 325 | 1.8 | 395 |
| Scots pine | Spain  | SO-24/1  | 88  | 1963 | 2015 | 8 | 1200 | 27.1 | 1366 | 651 | 8.5  | 813  | 316 | 4.1 | 396 |
| Scots pine | Spain  | SO-3/1   | 93  | 1963 | 2015 | 8 | 1170 | 24.7 | 1148 | 462 | 5.7  | 576  | 225 | 2.8 | 282 |
| Scots pine | Spain  | SO_18/1  | 116 | 1963 | 2015 | 8 | 550  | 34.6 | 927  | 484 | 5.2  | 574  | 233 | 2.4 | 277 |
| Scots pine | Spain  | SO_8/1   | 100 | 1963 | 2015 | 8 | 900  | 29.3 | 1161 | 606 | 4.9  | 760  | 294 | 2.3 | 369 |
| Scots pine | Spain  | TE-10/1  | 93  | 1964 | 2015 | 8 | 1270 | 23.6 | 1158 | 456 | 6.2  | 550  | 223 | 3.0 | 269 |
| Scots pine | Spain  | TE-14/1  | 115 | 1964 | 2015 | 8 | 808  | 27.4 | 936  | 375 | 2.8  | 442  | 182 | 1.3 | 215 |
| Scots pine | Spain  | TE-15/1  | 118 | 1964 | 2015 | 8 | 536  | 36.6 | 988  | 569 | 5.6  | 676  | 273 | 2.7 | 325 |
| Scots pine | Spain  | TE-16/1  | 124 | 1964 | 2015 | 8 | 981  | 27.4 | 1136 | 445 | 4.5  | 493  | 216 | 2.2 | 240 |
| Scots pine | Spain  | TE-3/1   | 111 | 1964 | 2015 | 8 | 767  | 30.9 | 1078 | 477 | 4.8  | 510  | 231 | 2.3 | 246 |
| Scots pine | Sweden | 1000/5   | 62  | 1981 | 2007 | 5 | 1750 | 17.1 | 947  | 375 | 8.6  | 396  | 185 | 4.2 | 196 |
| Scots pine | Sweden | 1004/4   | 77  | 1975 | 2006 | 5 | 978  | 20.5 | 713  | 316 | 8.1  | 435  | 155 | 3.9 | 214 |
| Scots pine | Sweden | 1005/4   | 72  | 1980 | 2015 | 7 | 710  | 23.9 | 662  | 340 | 8.6  | 472  | 166 | 4.2 | 231 |
| Scots pine | Sweden | 1005/6   | 72  | 1980 | 2015 | 7 | 1690 | 18.4 | 1034 | 468 | 10.9 | 497  | 231 | 5.3 | 245 |
| Scots pine | Sweden | 1006/1   | 66  | 1978 | 2014 | 6 | 710  | 21.5 | 558  | 247 | 7.2  | 383  | 121 | 3.5 | 188 |

|            |        |        |    |      |      |   |      |      |      |     |      |     |     |     |     |
|------------|--------|--------|----|------|------|---|------|------|------|-----|------|-----|-----|-----|-----|
| Scots pine | Sweden | 1006/6 | 66 | 1978 | 2014 | 6 | 2120 | 16.1 | 1044 | 419 | 9.2  | 450 | 208 | 4.5 | 224 |
| Scots pine | Sweden | 1007/2 | 77 | 1977 | 2015 | 6 | 960  | 21.3 | 745  | 349 | 6.4  | 431 | 171 | 3.1 | 212 |
| Scots pine | Sweden | 1008/2 | 67 | 1976 | 2015 | 6 | 1490 | 17.8 | 863  | 347 | 8.0  | 377 | 172 | 3.9 | 187 |
| Scots pine | Sweden | 1008/3 | 67 | 1976 | 2015 | 6 | 2170 | 16.4 | 1099 | 416 | 7.8  | 449 | 206 | 3.8 | 223 |
| Scots pine | Sweden | 1008/4 | 67 | 1986 | 2015 | 4 | 580  | 22.6 | 493  | 212 | 5.5  | 323 | 104 | 2.7 | 159 |
| Scots pine | Sweden | 1009/4 | 71 | 1981 | 2015 | 6 | 1010 | 20.1 | 709  | 299 | 5.7  | 326 | 147 | 2.7 | 161 |
| Scots pine | Sweden | 1009/6 | 71 | 1981 | 2015 | 6 | 510  | 23.0 | 446  | 202 | 5.4  | 291 | 99  | 2.6 | 143 |
| Scots pine | Sweden | 895/12 | 76 | 1970 | 2011 | 7 | 1610 | 19.0 | 1035 | 485 | 12.3 | 532 | 239 | 6.0 | 263 |
| Scots pine | Sweden | 895/2  | 70 | 1970 | 2005 | 6 | 470  | 24.5 | 456  | 221 | 5.3  | 364 | 108 | 2.5 | 178 |
| Scots pine | Sweden | 900/4  | 77 | 1966 | 2007 | 7 | 650  | 26.0 | 691  | 360 | 5.8  | 529 | 175 | 2.7 | 258 |
| Scots pine | Sweden | 902/1  | 75 | 1969 | 2007 | 6 | 750  | 23.6 | 686  | 318 | 4.1  | 388 | 156 | 1.9 | 190 |
| Scots pine | Sweden | 910/3  | 77 | 1966 | 2006 | 6 | 838  | 21.8 | 674  | 282 | 5.0  | 316 | 138 | 2.4 | 155 |
| Scots pine | Sweden | 912/1  | 87 | 1969 | 2016 | 6 | 1055 | 21.6 | 831  | 399 | 8.8  | 480 | 196 | 4.2 | 235 |
| Scots pine | Sweden | 913/4  | 82 | 1972 | 2006 | 6 | 1846 | 15.8 | 881  | 295 | 8.2  | 319 | 147 | 4.0 | 158 |
| Scots pine | Sweden | 918/4  | 84 | 1970 | 2006 | 6 | 1230 | 19.8 | 843  | 363 | 11.0 | 446 | 179 | 5.2 | 220 |
| Scots pine | Sweden | 922/9  | 86 | 1967 | 2007 | 7 | 1130 | 21.6 | 896  | 430 | 9.9  | 512 | 211 | 4.8 | 252 |
| Scots pine | Sweden | 923/1  | 75 | 1973 | 2007 | 5 | 1190 | 20.4 | 856  | 360 | 7.1  | 476 | 177 | 3.4 | 234 |
| Scots pine | Sweden | 924/9  | 59 | 1968 | 1993 | 5 | 830  | 21.0 | 625  | 265 | 7.7  | 350 | 130 | 3.7 | 172 |
| Scots pine | Sweden | 926/8  | 95 | 1969 | 2014 | 6 | 980  | 22.6 | 833  | 401 | 5.6  | 465 | 196 | 2.7 | 228 |
| Scots pine | Sweden | 927/6  | 83 | 1969 | 2007 | 7 | 870  | 20.6 | 638  | 277 | 3.5  | 377 | 136 | 1.7 | 186 |
| Scots pine | Sweden | 927/9  | 83 | 1969 | 2007 | 7 | 1190 | 19.4 | 795  | 354 | 5.9  | 437 | 174 | 2.9 | 215 |
| Scots pine | Sweden | 929/2  | 91 | 1970 | 2016 | 8 | 970  | 24.2 | 920  | 458 | 9.2  | 559 | 223 | 4.4 | 273 |
| Scots pine | Sweden | 930/3  | 73 | 1966 | 2007 | 7 | 640  | 24.9 | 635  | 327 | 6.9  | 481 | 159 | 3.3 | 235 |
| Scots pine | Sweden | 933/4  | 92 | 1973 | 2015 | 6 | 710  | 22.5 | 599  | 242 | 3.4  | 287 | 118 | 1.6 | 141 |
| Scots pine | Sweden | 935/3  | 73 | 1971 | 2007 | 7 | 1050 | 21.9 | 850  | 398 | 9.7  | 457 | 195 | 4.7 | 224 |
| Scots pine | Sweden | 936/3  | 69 | 1974 | 2007 | 6 | 1920 | 16.4 | 973  | 339 | 6.7  | 356 | 168 | 3.3 | 177 |
| Scots pine | Sweden | 938/6  | 89 | 1974 | 2005 | 5 | 460  | 19.8 | 317  | 116 | 4.0  | 195 | 57  | 2.0 | 97  |
| Scots pine | Sweden | 938/7  | 89 | 1974 | 2005 | 5 | 1860 | 14.4 | 770  | 240 | 5.7  | 245 | 120 | 2.8 | 122 |
| Scots pine | Sweden | 939/2  | 61 | 1981 | 2006 | 5 | 800  | 21.1 | 608  | 257 | 9.4  | 392 | 126 | 4.6 | 193 |



|               |         |        |    |      |      |    |      |      |      |     |      |      |     |      |     |
|---------------|---------|--------|----|------|------|----|------|------|------|-----|------|------|-----|------|-----|
| Scots pine    | Sweden  | 939/4  | 61 | 1981 | 2006 | 5  | 1820 | 17.7 | 1042 | 419 | 10.9 | 452  | 207 | 5.3  | 224 |
| Scots pine    | Sweden  | 940/9  | 92 | 1968 | 2013 | 7  | 667  | 25.7 | 696  | 353 | 4.8  | 390  | 172 | 2.3  | 190 |
| Scots pine    | Sweden  | 945/6  | 64 | 1973 | 2014 | 8  | 1040 | 21.6 | 819  | 393 | 12.0 | 573  | 193 | 5.8  | 282 |
| Scots pine    | Sweden  | 945/8  | 64 | 1973 | 2014 | 9  | 1650 | 18.9 | 1053 | 511 | 19.1 | 638  | 252 | 9.3  | 315 |
| Scots pine    | Sweden  | 946/2  | 73 | 1976 | 2015 | 7  | 1580 | 18.3 | 954  | 433 | 13.2 | 496  | 214 | 6.4  | 245 |
| Scots pine    | Sweden  | 947/1  | 73 | 1978 | 2015 | 6  | 1250 | 19.2 | 817  | 360 | 9.8  | 441  | 178 | 4.7  | 218 |
| Scots pine    | Sweden  | 947/4  | 73 | 1978 | 2015 | 6  | 800  | 22.0 | 654  | 305 | 10.1 | 412  | 149 | 4.9  | 203 |
| Scots pine    | Sweden  | 948/1  | 75 | 1975 | 2015 | 7  | 620  | 26.0 | 660  | 347 | 9.2  | 484  | 169 | 4.4  | 237 |
| Scots pine    | Sweden  | 948/5  | 75 | 1975 | 2015 | 7  | 1023 | 22.1 | 841  | 431 | 9.8  | 556  | 211 | 4.7  | 273 |
| Scots pine    | Sweden  | 951/3  | 89 | 1975 | 2014 | 6  | 1500 | 18.1 | 892  | 342 | 5.2  | 396  | 169 | 2.5  | 196 |
| Scots pine    | Sweden  | 952/2  | 94 | 1975 | 2014 | 7  | 1070 | 18.6 | 668  | 285 | 5.4  | 377  | 141 | 2.6  | 186 |
| Scots pine    | Sweden  | 989/5  | 86 | 1972 | 2006 | 6  | 1040 | 22.1 | 853  | 393 | 7.1  | 497  | 192 | 3.4  | 244 |
| Scots pine    | Sweden  | 990/2  | 86 | 1972 | 2006 | 6  | 660  | 22.3 | 550  | 229 | 5.1  | 356  | 112 | 2.5  | 175 |
| Scots pine    | Sweden  | 990/6  | 86 | 1972 | 2006 | 6  | 1460 | 17.6 | 832  | 296 | 4.4  | 383  | 146 | 2.1  | 190 |
| Scots pine    | Sweden  | 991/1  | 70 | 1976 | 2006 | 5  | 1210 | 17.1 | 660  | 247 | 7.0  | 355  | 122 | 3.4  | 176 |
| Scots pine    | Sweden  | 993/1  | 84 | 1983 | 2014 | 5  | 740  | 19.3 | 489  | 181 | 7.4  | 236  | 89  | 3.6  | 117 |
| Scots pine    | Sweden  | 993/3  | 84 | 1983 | 2014 | 5  | 1330 | 16.8 | 701  | 239 | 7.7  | 241  | 118 | 3.8  | 119 |
| Scots pine    | Sweden  | 994/1  | 88 | 1983 | 2014 | 5  | 1290 | 17.1 | 698  | 245 | 5.4  | 287  | 121 | 2.6  | 142 |
| Scots pine    | Sweden  | 994/2  | 88 | 1983 | 2014 | 5  | 530  | 21.3 | 410  | 154 | 3.6  | 208  | 76  | 1.8  | 102 |
| Scots pine    | Sweden  | 996/7  | 70 | 1973 | 2015 | 7  | 1448 | 21.3 | 1121 | 585 | 12.5 | 620  | 287 | 6.1  | 304 |
| Scots pine    | Sweden  | 999/1  | 74 | 1976 | 2014 | 6  | 1310 | 21.0 | 989  | 500 | 11.5 | 544  | 246 | 5.6  | 267 |
| Norway spruce | Austria | 220/10 | 75 | 1968 | 2003 | 8  | 1070 | 27.0 | 1211 | 761 | 19.0 | 982  | 393 | 9.7  | 507 |
| Norway spruce | Austria | 220/12 | 75 | 1968 | 2003 | 8  | 1040 | 26.7 | 1156 | 693 | 16.8 | 872  | 358 | 8.6  | 451 |
| Norway spruce | Austria | 220/20 | 75 | 1968 | 2003 | 8  | 1470 | 23.2 | 1304 | 701 | 18.0 | 874  | 364 | 9.2  | 454 |
| Norway spruce | Austria | 220/22 | 75 | 1968 | 2003 | 8  | 1240 | 26.1 | 1329 | 820 | 23.4 | 1010 | 424 | 12.0 | 523 |
| Norway spruce | Austria | 220/30 | 75 | 1968 | 2003 | 8  | 1660 | 22.5 | 1402 | 759 | 22.0 | 894  | 394 | 11.3 | 465 |
| Norway spruce | Austria | 220/32 | 75 | 1968 | 2003 | 8  | 1230 | 25.6 | 1278 | 751 | 23.8 | 920  | 388 | 12.2 | 476 |
| Norway spruce | Austria | 301/10 | 67 | 1977 | 2014 | 9  | 1262 | 24.2 | 1198 | 748 | 26.3 | 1099 | 387 | 13.3 | 571 |
| Norway spruce | Austria | 301/12 | 67 | 1974 | 2014 | 10 | 567  | 30.0 | 760  | 518 | 19.4 | 788  | 266 | 9.8  | 408 |

|               |         |        |    |      |      |    |      |      |      |     |      |     |     |      |     |
|---------------|---------|--------|----|------|------|----|------|------|------|-----|------|-----|-----|------|-----|
| Norway spruce | Austria | 301/20 | 67 | 1977 | 2014 | 9  | 976  | 24.9 | 970  | 616 | 23.5 | 884 | 319 | 11.9 | 459 |
| Norway spruce | Austria | 301/22 | 67 | 1974 | 2014 | 10 | 550  | 33.1 | 863  | 650 | 26.0 | 938 | 333 | 13.2 | 484 |
| Norway spruce | Austria | 302/10 | 52 | 1982 | 2002 | 5  | 1935 | 18.5 | 1193 | 510 | 26.8 | 762 | 267 | 13.7 | 399 |
| Norway spruce | Austria | 302/20 | 52 | 1982 | 2002 | 5  | 1845 | 18.6 | 1148 | 431 | 17.6 | 600 | 225 | 9.0  | 314 |
| Norway spruce | Austria | 303/30 | 52 | 1977 | 2002 | 6  | 2075 | 16.5 | 1065 | 383 | 15.4 | 518 | 201 | 7.9  | 272 |
| Norway spruce | Austria | 303/40 | 52 | 1977 | 2002 | 6  | 1627 | 19.4 | 1083 | 456 | 18.4 | 629 | 238 | 9.4  | 329 |
| Norway spruce | Austria | 303/50 | 52 | 1977 | 2002 | 6  | 1675 | 18.7 | 1051 | 416 | 15.8 | 621 | 217 | 8.0  | 325 |
| Norway spruce | Austria | 304/1  | 41 | 1969 | 1997 | 8  | 2390 | 17.1 | 1299 | 576 | 24.0 | 768 | 302 | 12.4 | 403 |
| Norway spruce | Austria | 304/10 | 41 | 1969 | 1997 | 7  | 2000 | 16.7 | 1047 | 459 | 22.5 | 701 | 241 | 11.5 | 368 |
| Norway spruce | Austria | 304/11 | 37 | 1969 | 1993 | 6  | 1020 | 22.2 | 843  | 407 | 28.8 | 674 | 211 | 14.8 | 351 |
| Norway spruce | Austria | 304/16 | 37 | 1969 | 1993 | 6  | 2030 | 18.3 | 1230 | 538 | 29.6 | 585 | 281 | 15.3 | 306 |
| Norway spruce | Austria | 304/2  | 37 | 1969 | 1993 | 6  | 1020 | 22.1 | 837  | 403 | 27.2 | 652 | 209 | 14.0 | 340 |
| Norway spruce | Austria | 304/7  | 37 | 1969 | 1993 | 6  | 1330 | 19.1 | 863  | 396 | 33.8 | 669 | 207 | 17.5 | 349 |
| Norway spruce | Denmark | IS/A   | 75 | 1936 | 1967 | 12 | 811  | 19.5 | 544  | 225 | 18.3 | 379 | 117 | 9.4  | 199 |
| Norway spruce | Denmark | IS/C   | 62 | 1935 | 1954 | 12 | 1071 | 15.4 | 490  | 141 | 11.2 | 234 | 74  | 5.8  | 123 |
| Norway spruce | Denmark | IS/D   | 78 | 1936 | 1970 | 14 | 903  | 18.7 | 569  | 230 | 12.4 | 407 | 120 | 6.4  | 214 |
| Norway spruce | Denmark | IS/F   | 62 | 1935 | 1954 | 12 | 1007 | 16.1 | 499  | 157 | 12.9 | 249 | 82  | 6.7  | 131 |
| Norway spruce | Denmark | IS/H   | 75 | 1936 | 1967 | 12 | 840  | 19.7 | 575  | 235 | 16.8 | 408 | 123 | 8.6  | 214 |
| Norway spruce | Denmark | IS/I   | 75 | 1934 | 1967 | 13 | 995  | 17.4 | 558  | 201 | 13.9 | 335 | 105 | 7.2  | 177 |
| Norway spruce | Denmark | IS/K   | 91 | 1936 | 1983 | 18 | 1086 | 19.6 | 734  | 330 | 8.5  | 543 | 172 | 4.4  | 285 |
| Norway spruce | Denmark | IS/L   | 66 | 1934 | 1958 | 11 | 1781 | 13.8 | 685  | 195 | 9.3  | 309 | 103 | 4.8  | 164 |
| Norway spruce | Denmark | IS/M   | 91 | 1936 | 1983 | 20 | 1933 | 15.2 | 874  | 319 | 3.0  | 490 | 168 | 1.5  | 258 |
| Norway spruce | Denmark | IS/N   | 78 | 1934 | 1970 | 14 | 626  | 20.7 | 463  | 201 | 13.9 | 353 | 105 | 7.1  | 185 |
| Norway spruce | Denmark | IS/O   | 78 | 1936 | 1970 | 14 | 937  | 18.7 | 586  | 236 | 13.5 | 416 | 124 | 6.9  | 219 |
| Norway spruce | Denmark | IS/Q   | 78 | 1936 | 1970 | 13 | 1539 | 16.6 | 796  | 289 | 11.0 | 441 | 152 | 5.7  | 232 |
| Norway spruce | Denmark | KM/1   | 53 | 1964 | 2000 | 10 | 1758 | 19.7 | 1201 | 599 | 22.1 | 841 | 312 | 11.3 | 439 |
| Norway spruce | Denmark | KM/2   | 41 | 1964 | 1988 | 8  | 1772 | 18.2 | 1063 | 493 | 27.8 | 683 | 258 | 14.3 | 358 |
| Norway spruce | Denmark | KM/5   | 41 | 1964 | 1988 | 13 | 729  | 25.8 | 769  | 439 | 30.4 | 755 | 227 | 15.5 | 393 |
| Norway spruce | Denmark | KM/6   | 29 | 1964 | 1976 | 6  | 2034 | 13.6 | 765  | 225 | 18.4 | 377 | 119 | 9.5  | 200 |

|               |            |                              |     |      |      |    |      |      |      |      |      |      |     |      |     |
|---------------|------------|------------------------------|-----|------|------|----|------|------|------|------|------|------|-----|------|-----|
| Norway spruce | England    | Achnashellach/3299           | 70  | 1957 | 1994 | 9  | 381  | 46.5 | 1030 | 756  | 14.2 | 1271 | 383 | 7.1  | 647 |
| Norway spruce | England    | Bennan/3164                  | 75  | 1947 | 2000 | 13 | 824  | 35.2 | 1424 | 1059 | 16.3 | 1385 | 541 | 8.2  | 710 |
| Norway spruce | England    | Bowmont/3651                 | 72  | 1930 | 1983 | 12 | 1877 | 24.0 | 1761 | 809  | 12.7 | 1018 | 419 | 6.5  | 528 |
| Norway spruce | England    | Bowmont/3652                 | 64  | 1930 | 1975 | 11 | 1951 | 22.3 | 1618 | 677  | 16.3 | 852  | 352 | 8.1  | 443 |
| Norway spruce | England    | Bowmont/3653                 | 64  | 1930 | 1975 | 11 | 1802 | 22.5 | 1523 | 649  | 22.6 | 845  | 337 | 11.3 | 439 |
| Norway spruce | England    | Bowmont/3654                 | 72  | 1930 | 1983 | 12 | 1951 | 23.7 | 1787 | 810  | 12.7 | 1004 | 420 | 6.5  | 521 |
| Norway spruce | England    | Bowmont/3661                 | 64  | 1930 | 1975 | 11 | 1037 | 27.4 | 1203 | 610  | 11.5 | 935  | 314 | 5.6  | 484 |
| Norway spruce | England    | Bowmont/3662                 | 62  | 1930 | 1974 | 10 | 988  | 28.8 | 1239 | 607  | 17.0 | 1019 | 312 | 8.6  | 527 |
| Norway spruce | England    | Bowmont/3663                 | 64  | 1930 | 1975 | 11 | 963  | 28.5 | 1190 | 595  | 5.4  | 997  | 306 | 2.6  | 516 |
| Norway spruce | England    | Bowmont/3664                 | 72  | 1930 | 1983 | 12 | 1012 | 30.9 | 1423 | 708  | 12.8 | 1107 | 363 | 6.4  | 572 |
| Norway spruce | England    | Clocaenog/2098               | 61  | 1954 | 1996 | 10 | 1651 | 23.1 | 1452 | 609  | 9.7  | 759  | 316 | 4.9  | 394 |
| Norway spruce | England    | Clocaenog/2099               | 61  | 1954 | 1996 | 10 | 816  | 30.0 | 1090 | 586  | 18.2 | 913  | 301 | 9.2  | 471 |
| Norway spruce | England    | Clunes/3426                  | 79  | 1968 | 2013 | 10 | 747  | 35.1 | 1290 | 1173 | 60.3 | 1647 | 599 | 30.6 | 843 |
| Norway spruce | England    | Clunes/3427                  | 79  | 1968 | 2013 | 10 | 914  | 36.4 | 1673 | 1347 | 33.2 | 1645 | 687 | 16.8 | 841 |
| Norway spruce | England    | Clunes/3428                  | 79  | 1968 | 2013 | 10 | 820  | 37.5 | 1571 | 1319 | 36.2 | 1595 | 673 | 18.2 | 814 |
| Norway spruce | England    | Coed-y-Brenin/2046           | 53  | 1948 | 1978 | 8  | 419  | 43.7 | 1028 | 743  | 17.0 | 1189 | 377 | 8.5  | 606 |
| Norway spruce | England    | Coed-y-Brenin_2/2048         | 52  | 1948 | 1978 | 8  | 735  | 31.0 | 1037 | 555  | 25.1 | 826  | 285 | 12.7 | 426 |
| Norway spruce | England    | Dodd Wood/1266               | 37  | 1950 | 1962 | 5  | 2022 | 16.2 | 1012 | 226  | 13.4 | 367  | 119 | 6.9  | 193 |
| Norway spruce | England    | Drumlanrig/3006              | 75  | 1919 | 1967 | 10 | 1039 | 30.9 | 1458 | 842  | 10.6 | 1060 | 432 | 5.3  | 545 |
| Norway spruce | England    | Glenbranter/3218             | 44  | 1949 | 1971 | 8  | 546  | 30.3 | 744  | 379  | 21.1 | 630  | 195 | 10.7 | 326 |
| Norway spruce | England    | Glentress/3142               | 76  | 1946 | 1977 | 9  | 412  | 37.7 | 795  | 547  | 1.8  | 900  | 279 | 0.8  | 460 |
| Norway spruce | England    | Rheola/2158                  | 77  | 1958 | 2010 | 11 | 981  | 35.2 | 1695 | 1158 | 44.3 | 1500 | 592 | 22.3 | 769 |
| Norway spruce | England    | Rheola/2159                  | 77  | 1958 | 2010 | 11 | 508  | 44.7 | 1290 | 901  | 16.0 | 1500 | 456 | 7.9  | 764 |
| Norway spruce | England    | Rheola/2160                  | 44  | 1958 | 1977 | 5  | 618  | 32.9 | 961  | 454  | 21.2 | 655  | 232 | 10.8 | 337 |
| Norway spruce | England    | Soudley -<br>Abbotswood/1090 | 70  | 1927 | 1973 | 10 | 437  | 37.4 | 833  | 642  | 31.0 | 1022 | 328 | 15.6 | 524 |
| Norway spruce | England    | Tintern/2015                 | 84  | 1928 | 1984 | 13 | 348  | 48.6 | 1011 | 908  | 60.5 | 1522 | 459 | 29.9 | 774 |
| Norway spruce | England    | Tintern/2016                 | 101 | 1928 | 2002 | 16 | 509  | 43.0 | 1214 | 1039 | 14.3 | 1588 | 527 | 7.1  | 809 |
| Norway spruce | Germany BW | Fi 18/1                      | 75  | 1873 | 1918 | 8  | 888  | 28.6 | 1102 | 755  | 24.7 | 1054 | 389 | 12.6 | 544 |
| Norway spruce | Germany BW | Fi 26/A                      | 57  | 1873 | 1900 | 7  | 956  | 25.3 | 974  | 574  | 19.4 | 845  | 297 | 9.7  | 437 |

|               |            |          |     |      |      |    |      |      |      |     |      |      |     |      |     |
|---------------|------------|----------|-----|------|------|----|------|------|------|-----|------|------|-----|------|-----|
| Norway spruce | Germany BW | Fi 27/1  | 83  | 1873 | 1926 | 12 | 562  | 35.9 | 1005 | 861 | 24.5 | 1439 | 439 | 12.2 | 738 |
| Norway spruce | Germany BW | Fi 28/1  | 75  | 1873 | 1918 | 10 | 528  | 35.8 | 940  | 759 | 20.9 | 1356 | 388 | 10.4 | 696 |
| Norway spruce | Germany BW | Fi 57/1  | 71  | 1874 | 1913 | 7  | 1512 | 20.4 | 1091 | 625 | 23.7 | 788  | 326 | 12.2 | 411 |
| Norway spruce | Germany BW | Fi 58/1  | 64  | 1874 | 1908 | 6  | 1444 | 18.7 | 906  | 435 | 14.8 | 539  | 227 | 7.7  | 282 |
| Norway spruce | Germany BW | Fi 81/1  | 127 | 1874 | 1957 | 13 | 544  | 33.2 | 858  | 672 | 9.7  | 1097 | 344 | 4.9  | 564 |
| Norway spruce | Germany BW | Fi 82/1  | 81  | 1887 | 1929 | 7  | 1480 | 20.2 | 1051 | 518 | 16.3 | 713  | 270 | 8.4  | 372 |
| Norway spruce | Germany BW | Fi 113/1 | 191 | 1881 | 1996 | 15 | 540  | 31.9 | 799  | 497 | 7.8  | 748  | 255 | 3.9  | 385 |
| Norway spruce | Germany BW | Fi 151/1 | 90  | 1886 | 1934 | 9  | 760  | 27.3 | 875  | 563 | 16.4 | 893  | 291 | 8.3  | 462 |
| Norway spruce | Germany BW | Fi 154/1 | 77  | 1887 | 1934 | 9  | 790  | 29.3 | 1019 | 745 | 21.0 | 1141 | 383 | 10.6 | 589 |
| Norway spruce | Germany BW | Fi 155/1 | 59  | 1888 | 1919 | 6  | 1210 | 22.4 | 1014 | 555 | 17.6 | 798  | 288 | 8.9  | 415 |
| Norway spruce | Germany BW | Fi 157/1 | 71  | 1889 | 1935 | 8  | 756  | 31.7 | 1107 | 871 | 22.5 | 1266 | 447 | 11.3 | 652 |
| Norway spruce | Germany BW | Fi 158/1 | 71  | 1889 | 1935 | 8  | 632  | 31.3 | 907  | 667 | 17.8 | 1151 | 342 | 8.9  | 593 |
| Norway spruce | Germany BW | Fi 162/1 | 70  | 1892 | 1935 | 8  | 756  | 30.0 | 1013 | 749 | 17.8 | 1156 | 385 | 9.0  | 597 |
| Norway spruce | Germany BW | Fi 167/1 | 71  | 1893 | 1931 | 8  | 948  | 23.9 | 882  | 515 | 14.7 | 787  | 267 | 7.5  | 409 |
| Norway spruce | Germany BW | Fi 169/1 | 69  | 1893 | 1929 | 7  | 1025 | 23.0 | 897  | 511 | 18.8 | 766  | 265 | 9.6  | 399 |
| Norway spruce | Germany BW | Fi 170/1 | 71  | 1895 | 1937 | 7  | 1088 | 23.0 | 952  | 553 | 19.3 | 856  | 287 | 9.9  | 445 |
| Norway spruce | Germany BW | Fi 171/1 | 70  | 1895 | 1937 | 7  | 648  | 28.6 | 804  | 547 | 19.1 | 965  | 282 | 9.6  | 499 |
| Norway spruce | Germany BW | Fi 192/1 | 73  | 1903 | 1940 | 8  | 748  | 27.4 | 867  | 586 | 15.3 | 946  | 302 | 7.8  | 489 |
| Norway spruce | Germany BW | Fi 193/1 | 77  | 1903 | 1940 | 8  | 535  | 30.3 | 728  | 519 | 13.6 | 858  | 267 | 6.8  | 443 |
| Norway spruce | Germany BW | Fi 194/1 | 72  | 1903 | 1934 | 7  | 730  | 26.3 | 792  | 497 | 16.9 | 845  | 257 | 8.6  | 438 |
| Norway spruce | Germany BW | Fi 195/1 | 76  | 1903 | 1940 | 8  | 710  | 25.3 | 724  | 451 | 14.2 | 690  | 233 | 7.1  | 358 |
| Norway spruce | Germany BW | Fi 196/1 | 86  | 1913 | 1964 | 10 | 810  | 27.0 | 916  | 617 | 22.5 | 892  | 318 | 11.5 | 462 |
| Norway spruce | Germany BW | Fi 197/1 | 69  | 1903 | 1934 | 7  | 808  | 22.4 | 677  | 336 | 10.7 | 500  | 174 | 5.5  | 260 |
| Norway spruce | Germany BW | Fi 198/1 | 70  | 1903 | 1946 | 9  | 752  | 26.5 | 826  | 498 | 12.3 | 860  | 257 | 6.2  | 446 |
| Norway spruce | Germany BW | Fi 199/1 | 128 | 1913 | 2013 | 20 | 360  | 43.8 | 885  | 868 | 10.8 | 1457 | 440 | 5.3  | 743 |
| Norway spruce | Germany BW | Fi 200/1 | 91  | 1913 | 1976 | 15 | 540  | 31.4 | 779  | 551 | 13.3 | 930  | 283 | 6.7  | 480 |
| Norway spruce | Germany BW | Fi 201/1 | 76  | 1913 | 1961 | 10 | 688  | 28.3 | 839  | 566 | 16.5 | 869  | 292 | 8.3  | 449 |
| Norway spruce | Germany BW | Fi 204/A | 56  | 1913 | 1939 | 6  | 1848 | 15.4 | 849  | 272 | 14.4 | 388  | 143 | 7.5  | 205 |
| Norway spruce | Germany BW | Fi 205/1 | 105 | 1913 | 1988 | 15 | 632  | 34.9 | 1080 | 860 | 16.0 | 1323 | 439 | 8.1  | 680 |

|               |            |           |     |      |      |    |      |      |      |      |      |      |     |      |     |
|---------------|------------|-----------|-----|------|------|----|------|------|------|------|------|------|-----|------|-----|
| Norway spruce | Germany BW | Fi 206/1  | 91  | 1913 | 1976 | 14 | 648  | 30.3 | 882  | 626  | 22.3 | 1115 | 322 | 11.2 | 576 |
| Norway spruce | Germany BW | Fi 207/1  | 100 | 1913 | 1988 | 15 | 528  | 35.3 | 919  | 723  | 17.8 | 1232 | 369 | 9.0  | 633 |
| Norway spruce | Germany BW | Fi 208/1  | 88  | 1913 | 1976 | 14 | 640  | 30.2 | 867  | 605  | 19.8 | 1031 | 311 | 10.0 | 532 |
| Norway spruce | Germany BW | Fi 215/1  | 71  | 1904 | 1943 | 8  | 748  | 29.3 | 965  | 662  | 21.2 | 1071 | 341 | 10.7 | 553 |
| Norway spruce | Germany BW | Fi 216/1  | 64  | 1904 | 1936 | 7  | 856  | 26.2 | 923  | 567  | 17.5 | 889  | 293 | 8.8  | 461 |
| Norway spruce | Germany BW | Fi 217/1  | 71  | 1904 | 1943 | 8  | 832  | 27.1 | 947  | 612  | 21.8 | 960  | 316 | 11.0 | 498 |
| Norway spruce | Germany BW | Fi 218/1  | 71  | 1904 | 1943 | 8  | 676  | 29.6 | 886  | 599  | 16.7 | 994  | 308 | 8.4  | 514 |
| Norway spruce | Germany BW | Fi 219/1  | 64  | 1904 | 1936 | 7  | 868  | 26.2 | 936  | 596  | 20.4 | 927  | 308 | 10.3 | 480 |
| Norway spruce | Germany BW | Fi 220/1  | 64  | 1904 | 1936 | 7  | 724  | 27.0 | 819  | 531  | 15.4 | 963  | 274 | 7.7  | 499 |
| Norway spruce | Germany BW | Fi 221/1  | 71  | 1904 | 1943 | 8  | 672  | 29.1 | 857  | 565  | 17.5 | 998  | 291 | 8.8  | 516 |
| Norway spruce | Germany BW | Fi 222/1  | 76  | 1904 | 1948 | 9  | 636  | 27.6 | 745  | 500  | 10.0 | 884  | 258 | 5.0  | 458 |
| Norway spruce | Germany BW | Fi 223/A  | 85  | 1905 | 1958 | 8  | 720  | 29.0 | 914  | 628  | 13.4 | 977  | 323 | 6.8  | 505 |
| Norway spruce | Germany BW | Fi 235/1  | 64  | 1905 | 1938 | 7  | 712  | 28.3 | 869  | 575  | 18.7 | 957  | 296 | 9.4  | 494 |
| Norway spruce | Germany BW | Fi 236/1  | 65  | 1905 | 1938 | 7  | 1028 | 21.5 | 807  | 383  | 14.6 | 623  | 199 | 7.5  | 325 |
| Norway spruce | Germany BW | Fi 244/1  | 72  | 1907 | 1948 | 9  | 550  | 31.8 | 809  | 607  | 17.3 | 1068 | 311 | 8.7  | 550 |
| Norway spruce | Germany BW | Fi 261/1  | 60  | 1924 | 1961 | 9  | 848  | 25.8 | 892  | 577  | 25.6 | 972  | 298 | 13.0 | 504 |
| Norway spruce | Germany BW | Fi 262/1  | 80  | 1913 | 1966 | 12 | 668  | 28.5 | 824  | 573  | 16.2 | 916  | 295 | 8.2  | 474 |
| Norway spruce | Germany BW | Fi 263/1  | 80  | 1919 | 1966 | 11 | 580  | 31.7 | 849  | 640  | 19.4 | 1005 | 328 | 9.8  | 518 |
| Norway spruce | Germany BW | Fi 280/1  | 83  | 1935 | 1997 | 14 | 416  | 42.9 | 990  | 953  | 20.9 | 1592 | 484 | 10.4 | 813 |
| Norway spruce | Germany BW | Fi 281/1  | 56  | 1935 | 1968 | 9  | 1272 | 24.5 | 1231 | 798  | 25.1 | 1048 | 413 | 12.7 | 543 |
| Norway spruce | Germany BW | Fi 386/10 | 40  | 1983 | 2002 | 7  | 1250 | 21.3 | 967  | 509  | 29.1 | 676  | 265 | 14.9 | 352 |
| Norway spruce | Germany BW | Fi 386/12 | 44  | 1983 | 2002 | 7  | 1600 | 21.8 | 1284 | 722  | 34.4 | 806  | 375 | 17.6 | 419 |
| Norway spruce | Germany BW | Fi 386/4  | 40  | 1983 | 2002 | 7  | 1110 | 18.7 | 697  | 299  | 21.6 | 512  | 156 | 11.1 | 268 |
| Norway spruce | Germany BW | Fi 393/3  | 75  | 1958 | 1988 | 7  | 662  | 27.9 | 790  | 548  | 18.6 | 960  | 282 | 9.4  | 496 |
| Norway spruce | Germany BW | Fi 399/2  | 69  | 1980 | 2015 | 8  | 1116 | 28.5 | 1377 | 862  | 31.6 | 965  | 444 | 16.1 | 498 |
| Norway spruce | Germany BW | Fi 401/2D | 70  | 1969 | 2014 | 13 | 520  | 39.2 | 1070 | 958  | 30.7 | 1348 | 488 | 15.4 | 689 |
| Norway spruce | Germany BW | Fi 405/10 | 55  | 1982 | 2015 | 10 | 1540 | 24.5 | 1491 | 1027 | 34.5 | 1186 | 531 | 17.6 | 614 |
| Norway spruce | Germany BW | Fi 405/4  | 55  | 1982 | 2015 | 10 | 1710 | 23.5 | 1548 | 1007 | 35.6 | 1134 | 522 | 18.2 | 588 |
| Norway spruce | Germany BW | Fi 469/1  | 76  | 1879 | 1918 | 6  | 652  | 27.6 | 764  | 473  | 11.4 | 835  | 244 | 5.8  | 432 |

|               |             |             |     |      |      |    |      |      |      |      |      |      |     |      |      |
|---------------|-------------|-------------|-----|------|------|----|------|------|------|------|------|------|-----|------|------|
| Norway spruce | Germany GOE | ID 054511/2 | 137 | 1916 | 2014 | 21 | 471  | 42.5 | 1104 | 1021 | 12.2 | 1506 | 518 | 6.0  | 768  |
| Norway spruce | Germany GOE | ID 064511/2 | 89  | 1928 | 1994 | 18 | 463  | 39.1 | 949  | 790  | 14.0 | 1260 | 402 | 6.9  | 644  |
| Norway spruce | Germany GOE | ID 064511/3 | 84  | 1933 | 1989 | 16 | 392  | 40.5 | 850  | 711  | 15.4 | 1140 | 362 | 7.8  | 582  |
| Norway spruce | Germany GOE | ID 071511/2 | 118 | 1928 | 2004 | 18 | 535  | 42.5 | 1254 | 1234 | 14.2 | 1707 | 626 | 7.0  | 870  |
| Norway spruce | Germany GOE | ID 075511/3 | 103 | 1928 | 1994 | 18 | 432  | 38.3 | 857  | 759  | 10.6 | 1284 | 387 | 5.3  | 657  |
| Norway spruce | Germany GOE | ID 075511/5 | 79  | 1928 | 1970 | 11 | 616  | 31.9 | 911  | 659  | 12.8 | 982  | 338 | 6.4  | 505  |
| Norway spruce | Germany GOE | ID 103511/4 | 132 | 1938 | 2009 | 16 | 340  | 45.3 | 883  | 852  | 18.6 | 1378 | 432 | 9.3  | 701  |
| Norway spruce | Germany GOE | ID 103511/5 | 137 | 1938 | 2014 | 17 | 332  | 45.2 | 859  | 786  | 9.2  | 1310 | 398 | 4.5  | 667  |
| Norway spruce | Germany GOE | ID 116511/0 | 129 | 1951 | 2012 | 14 | 276  | 47.0 | 760  | 696  | 4.0  | 1006 | 352 | 2.0  | 510  |
| Norway spruce | Germany GOE | ID 471511/4 | 57  | 1978 | 2012 | 9  | 470  | 35.6 | 829  | 612  | 21.8 | 984  | 313 | 10.9 | 504  |
| Norway spruce | Germany GOE | ID 474511/2 | 57  | 1978 | 2012 | 8  | 530  | 31.8 | 780  | 484  | 21.4 | 748  | 248 | 10.8 | 385  |
| Norway spruce | Germany GOE | ID 474511/4 | 57  | 1978 | 2012 | 8  | 1415 | 23.6 | 1290 | 676  | 23.0 | 762  | 350 | 11.7 | 395  |
| Norway spruce | Germany GOE | ID 555511/3 | 56  | 1988 | 2012 | 6  | 780  | 27.1 | 888  | 462  | 19.6 | 630  | 238 | 10.0 | 325  |
| Norway spruce | Germany GOE | ID 557511/2 | 56  | 1980 | 2012 | 8  | 1300 | 23.1 | 1145 | 575  | 18.8 | 652  | 298 | 9.6  | 338  |
| Norway spruce | Germany GOE | ID S10511/1 | 70  | 1963 | 2011 | 10 | 1002 | 24.0 | 938  | 414  | 10.2 | 507  | 214 | 5.2  | 263  |
| Norway spruce | Germany GOE | ID S10511/3 | 70  | 1963 | 2011 | 10 | 1961 | 20.6 | 1437 | 605  | 15.0 | 642  | 315 | 7.7  | 334  |
| Norway spruce | Germany GOE | ID S20511/1 | 79  | 1967 | 2012 | 7  | 648  | 32.3 | 978  | 588  | 11.0 | 856  | 301 | 5.5  | 440  |
| Norway spruce | Germany GOE | ID S20511/2 | 79  | 1967 | 2012 | 7  | 790  | 30.9 | 1110 | 717  | 22.4 | 984  | 368 | 11.3 | 506  |
| Norway spruce | Germany GOE | ID S20511/3 | 79  | 1967 | 2012 | 7  | 628  | 35.1 | 1083 | 736  | 19.0 | 956  | 376 | 9.6  | 490  |
| Norway spruce | Germany GOE | ID S22511/1 | 85  | 1967 | 2012 | 6  | 1152 | 27.3 | 1327 | 734  | 16.0 | 899  | 379 | 8.1  | 464  |
| Norway spruce | Germany GOE | ID S22511/2 | 85  | 1967 | 2012 | 7  | 1088 | 27.3 | 1253 | 665  | 12.4 | 842  | 343 | 6.3  | 435  |
| Norway spruce | Germany GOE | ID S24511/1 | 86  | 1967 | 2012 | 6  | 665  | 33.6 | 1069 | 760  | 12.6 | 1193 | 389 | 6.3  | 612  |
| Norway spruce | Germany GOE | ID S26511/2 | 72  | 1963 | 2013 | 11 | 480  | 35.2 | 831  | 613  | 19.0 | 965  | 313 | 9.6  | 495  |
| Norway spruce | Germany GOE | ID S26511/3 | 62  | 1963 | 2003 | 9  | 521  | 32.5 | 794  | 473  | 15.5 | 732  | 242 | 7.8  | 377  |
| Norway spruce | Germany GOE | ID S26511/4 | 72  | 1963 | 2013 | 11 | 886  | 28.9 | 1118 | 738  | 17.2 | 962  | 380 | 8.7  | 496  |
| Norway spruce | Germany MUE | 111/5       | 97  | 1954 | 1992 | 6  | 286  | 44.6 | 724  | 771  | 12.4 | 1276 | 391 | 6.2  | 648  |
| Norway spruce | Germany MUE | 43832       | 122 | 1882 | 1972 | 15 | 492  | 44.7 | 1250 | 1364 | 15.6 | 2189 | 691 | 7.8  | 1115 |
| Norway spruce | Germany MUE | 43863       | 107 | 1882 | 1957 | 13 | 472  | 44.4 | 1187 | 1237 | 19.5 | 2063 | 627 | 9.6  | 1052 |
| Norway spruce | Germany MUE | 227/6       | 112 | 1959 | 2015 | 10 | 440  | 34.1 | 724  | 497  | 11.1 | 718  | 254 | 5.6  | 369  |

|               |             |       |     |      |      |    |      |      |      |      |      |      |     |      |      |
|---------------|-------------|-------|-----|------|------|----|------|------|------|------|------|------|-----|------|------|
| Norway spruce | Germany MUE | 43864 | 116 | 1882 | 1965 | 14 | 480  | 45.2 | 1242 | 1338 | 15.9 | 1951 | 678 | 7.9  | 994  |
| Norway spruce | Germany MUE | 43835 | 143 | 1882 | 1990 | 18 | 496  | 47.6 | 1394 | 1505 | 16.6 | 2147 | 761 | 8.2  | 1091 |
| Norway spruce | Germany MUE | 43866 | 143 | 1882 | 1990 | 18 | 388  | 54.0 | 1335 | 1597 | 17.0 | 2290 | 804 | 8.4  | 1159 |
| Norway spruce | Germany MUE | 67/1  | 131 | 1902 | 1990 | 14 | 443  | 50.7 | 1378 | 1637 | 18.6 | 2377 | 826 | 9.2  | 1205 |
| Norway spruce | Germany MUE | 67/2  | 131 | 1902 | 1990 | 14 | 344  | 54.4 | 1198 | 1453 | 18.2 | 2460 | 731 | 9.0  | 1246 |
| Norway spruce | Germany MUE | 68/1  | 130 | 1902 | 1990 | 14 | 544  | 45.3 | 1412 | 1566 | 17.8 | 2271 | 793 | 8.9  | 1155 |
| Norway spruce | Germany MUE | 68/2  | 130 | 1902 | 1990 | 14 | 376  | 50.3 | 1155 | 1365 | 16.4 | 2300 | 689 | 8.1  | 1167 |
| Norway spruce | Germany MUE | 72/1  | 120 | 1906 | 1990 | 14 | 600  | 37.5 | 1150 | 912  | 10.1 | 1488 | 465 | 5.0  | 764  |
| Norway spruce | Germany MUE | 72/2  | 120 | 1906 | 1990 | 13 | 556  | 41.0 | 1230 | 1200 | 18.3 | 1735 | 610 | 9.2  | 886  |
| Norway spruce | Germany MUE | 73/1  | 119 | 1906 | 1983 | 12 | 672  | 36.9 | 1255 | 1123 | 16.4 | 1489 | 573 | 8.3  | 762  |
| Norway spruce | Germany MUE | 73/2  | 119 | 1906 | 1983 | 12 | 520  | 39.9 | 1101 | 1064 | 17.8 | 1606 | 541 | 8.9  | 821  |
| Norway spruce | Germany MUE | 43838 | 113 | 1882 | 1963 | 14 | 632  | 40.6 | 1376 | 1473 | 14.6 | 2214 | 749 | 7.3  | 1130 |
| Norway spruce | Germany MUE | 43869 | 119 | 1882 | 1969 | 15 | 476  | 45.3 | 1236 | 1425 | 14.0 | 2311 | 722 | 7.0  | 1177 |
| Norway spruce | Germany MUE | 84/2  | 127 | 1921 | 2007 | 13 | 472  | 46.8 | 1291 | 1331 | 14.9 | 2166 | 673 | 7.4  | 1101 |
| Norway spruce | Sweden      | 682/8 | 64  | 1967 | 2007 | 7  | 1861 | 17.3 | 1029 | 511  | 17.5 | 604  | 268 | 9.0  | 317  |
| Norway spruce | Sweden      | 901/7 | 56  | 1979 | 2006 | 5  | 1030 | 26.4 | 1122 | 663  | 21.6 | 693  | 342 | 11.0 | 358  |
| Norway spruce | Sweden      | 905/2 | 81  | 1968 | 2007 | 8  | 890  | 27.4 | 1031 | 797  | 22.7 | 946  | 411 | 11.6 | 488  |
| Norway spruce | Sweden      | 905/5 | 84  | 1968 | 2007 | 8  | 420  | 32.7 | 645  | 490  | 14.4 | 726  | 251 | 7.3  | 374  |
| Norway spruce | Sweden      | 907/5 | 63  | 1971 | 2007 | 7  | 1520 | 19.8 | 1044 | 580  | 15.2 | 682  | 302 | 7.8  | 356  |
| Norway spruce | Sweden      | 914/2 | 57  | 1975 | 2002 | 5  | 870  | 24.0 | 814  | 459  | 19.8 | 678  | 238 | 10.1 | 351  |
| Norway spruce | Sweden      | 915/1 | 61  | 1968 | 2000 | 6  | 1590 | 20.2 | 1130 | 585  | 13.4 | 672  | 305 | 6.9  | 351  |
| Norway spruce | Sweden      | 916/4 | 57  | 1968 | 1999 | 6  | 1630 | 20.3 | 1169 | 662  | 15.6 | 752  | 345 | 8.0  | 392  |
| Norway spruce | Sweden      | 917/1 | 68  | 1972 | 2006 | 6  | 1770 | 16.3 | 888  | 388  | 14.6 | 526  | 204 | 7.6  | 276  |
| Norway spruce | Sweden      | 920/9 | 71  | 1967 | 2001 | 7  | 1300 | 25.2 | 1313 | 846  | 18.3 | 1032 | 438 | 9.3  | 534  |
| Norway spruce | Sweden      | 921/2 | 71  | 1966 | 2007 | 7  | 1070 | 25.9 | 1134 | 712  | 16.9 | 1044 | 368 | 8.5  | 541  |
| Norway spruce | Sweden      | 925/3 | 62  | 1973 | 1999 | 5  | 1824 | 17.9 | 1070 | 486  | 9.5  | 530  | 254 | 4.9  | 277  |
| Norway spruce | Sweden      | 928/5 | 51  | 1979 | 2007 | 6  | 940  | 22.0 | 768  | 413  | 19.2 | 680  | 214 | 9.9  | 354  |
| Norway spruce | Sweden      | 928/7 | 51  | 1979 | 2007 | 6  | 1280 | 19.4 | 851  | 437  | 18.4 | 643  | 228 | 9.5  | 336  |
| Norway spruce | Sweden      | 932/1 | 69  | 1968 | 2002 | 6  | 1940 | 17.0 | 1049 | 464  | 9.6  | 512  | 243 | 5.0  | 268  |

|               |             |            |     |      |      |    |      |      |      |      |      |      |     |      |     |
|---------------|-------------|------------|-----|------|------|----|------|------|------|------|------|------|-----|------|-----|
| Norway spruce | Sweden      | 937/4      | 61  | 1974 | 2007 | 6  | 1310 | 24.8 | 1292 | 889  | 24.9 | 1101 | 460 | 12.7 | 570 |
| Norway spruce | Sweden      | 941/7      | 64  | 1968 | 2001 | 7  | 1676 | 21.0 | 1265 | 690  | 25.1 | 839  | 359 | 12.8 | 438 |
| Norway spruce | Sweden      | 943/6      | 72  | 1969 | 2003 | 7  | 590  | 26.5 | 647  | 379  | 17.9 | 612  | 196 | 9.1  | 317 |
| Norway spruce | Sweden      | 943/9      | 72  | 1969 | 2003 | 7  | 1752 | 17.9 | 1028 | 487  | 17.5 | 579  | 255 | 9.0  | 303 |
| Norway spruce | Sweden      | 944/2      | 66  | 1971 | 2006 | 6  | 1230 | 24.8 | 1215 | 762  | 25.8 | 903  | 394 | 13.1 | 468 |
| Norway spruce | Sweden      | 950/3      | 68  | 1975 | 2015 | 7  | 1670 | 23.8 | 1547 | 1003 | 27.1 | 1133 | 519 | 13.9 | 587 |
| Norway spruce | Sweden      | 950/4      | 68  | 1975 | 2015 | 7  | 830  | 29.0 | 1052 | 750  | 22.5 | 961  | 386 | 11.5 | 496 |
| Norway spruce | Sweden      | 995/5      | 53  | 1979 | 2002 | 5  | 1080 | 25.0 | 1083 | 633  | 19.7 | 795  | 327 | 10.1 | 412 |
| Norway spruce | Switzerland | 1021000/1  | 149 | 1912 | 1993 | 15 | 462  | 51.8 | 1488 | 669  | 11.6 | 1211 | 337 | 5.8  | 615 |
| Norway spruce | Switzerland | 10260/1    | 65  | 1925 | 1954 | 6  | 600  | 26.6 | 662  | 500  | 15.0 | 831  | 258 | 7.5  | 430 |
| Norway spruce | Switzerland | 10440/1    | 82  | 1929 | 1963 | 7  | 425  | 35.2 | 734  | 613  | 17.3 | 1103 | 313 | 8.6  | 566 |
| Norway spruce | Switzerland | 21019000/1 | 94  | 1892 | 1963 | 13 | 624  | 38.4 | 1243 | 1062 | 16.9 | 1452 | 541 | 8.4  | 743 |
| Norway spruce | Switzerland | 21221000/1 | 96  | 1898 | 1975 | 12 | 693  | 32.0 | 1027 | 572  | 9.0  | 927  | 293 | 4.5  | 477 |
| Norway spruce | Switzerland | 21222000/1 | 85  | 1910 | 1969 | 10 | 1204 | 26.2 | 1299 | 542  | 9.9  | 877  | 280 | 5.0  | 454 |
| Norway spruce | Switzerland | 21275000/1 | 71  | 1905 | 1945 | 8  | 1626 | 21.7 | 1295 | 433  | 12.6 | 712  | 225 | 6.5  | 371 |
| Norway spruce | Switzerland | 212760/1   | 94  | 1908 | 1947 | 9  | 237  | 41.7 | 539  | 471  | 4.6  | 843  | 239 | 2.3  | 429 |
| Norway spruce | Switzerland | 212760/2   | 89  | 1908 | 1942 | 8  | 293  | 38.8 | 593  | 492  | 13.4 | 870  | 251 | 6.7  | 444 |
| Norway spruce | Switzerland | 21290000/1 | 109 | 1918 | 1981 | 12 | 338  | 35.7 | 597  | 430  | 10.8 | 774  | 220 | 5.5  | 398 |
| Norway spruce | Switzerland | 4011000/1  | 72  | 1937 | 1974 | 8  | 412  | 37.5 | 790  | 625  | 20.5 | 1020 | 318 | 10.3 | 522 |
| Norway spruce | Switzerland | 4012000/1  | 73  | 1937 | 1974 | 8  | 424  | 35.1 | 731  | 558  | 21.2 | 1000 | 285 | 10.6 | 514 |
